1 **The pneumococcal two-component system VisRH is linked to enhanced**  
2 **intracellular survival of *Streptococcus pneumoniae* in influenza-infected**  
3 **pneumocytes.**

4

5 Nicolás M. Reinoso-Vizcaíno<sup>1</sup>, Melina B. Cian<sup>1,2</sup>, Paulo R. Cortes<sup>1</sup>, Nadia B. Olivero<sup>1</sup>, Mirelys  
6 Hernandez-Morfa<sup>1</sup>, Germán E. Piñas<sup>1,3</sup>, Chandan Badapanda<sup>4</sup>, Ankita Rathore<sup>4</sup>, Daniel R. Perez<sup>5</sup>  
7 and José Echenique<sup>\*,1</sup>

8 Departamento de Bioquímica Clínica - CIBICI (CONICET), Facultad de Ciencias Químicas,  
9 Universidad Nacional de Córdoba, Córdoba, Argentina<sup>1</sup>.

10 Health Sciences Center, University of Oklahoma<sup>2</sup>.

11 School of Biological Sciences, University of Utah, Salt Lake City, USA<sup>3</sup>.

12 Bioinformatics Division, Xcelris Labs Limited, Ahmedabad, India<sup>4</sup>.

13 Department of Population Health, College of Veterinary Medicine, University of Georgia, Athens,  
14 Georgia, USA<sup>5</sup>.

15

16 **Running title:** Influenza A enhances the intracellular survival of *S. pneumoniae*

17 **Keywords:** *Streptococcus pneumoniae*, influenza A, pneumocytes, two-component systems,  
18 acidic stress, oxidative stress, stress response, intracellular survival, chaperone, manganese  
19 transporter, autophagy.

20 **\*Corresponding author**

21 **Mailing address:** Departamento de Bioquímica Clínica, CIBICI (CONICET), Facultad de  
22 Ciencias Químicas, Universidad Nacional de Córdoba. Medina Allende esq. Haya de la Torre,  
23 Ciudad Universitaria. CP X5000HUA Córdoba, ARGENTINA. Phone: +54-351-5353875 (ext.  
24 3143). E-mail: [jeche@fcq.unc.edu.ar](mailto:jeche@fcq.unc.edu.ar).

25

26

## 27 **Abstract**

28 The virus-bacterial synergism implicated in secondary bacterial infections caused by  
29 *Streptococcus pneumoniae* following infection with epidemic or pandemic influenza A virus (IAV)  
30 is well documented. However, the molecular mechanisms behind such synergism remain largely  
31 ill-defined. In pneumocytes infected with influenza A virus, subsequent infection with *S.*  
32 *pneumoniae* leads to enhanced pneumococcal intracellular survival. The pneumococcal two-  
33 component system VisRH appears essential for such enhanced survival. Through comparative  
34 transcriptomic analysis between the  $\Delta visR$  and *wt* strains, a list of 179 differentially expressed  
35 genes was defined. Among those, the *clpL* protein chaperone gene and the *psaB*  $Mn^{+2}$   
36 transporter gene, which are involved in the stress response, are important in enhancing *S.*  
37 *pneumoniae* survival in influenza-infected cells. The  $\Delta visR$ ,  $\Delta clpL$  and  $\Delta psaB$  deletion mutants  
38 display increased susceptibility to acidic and oxidative stress and no enhancement of intracellular  
39 survival in IAV-infected pneumocyte cells. These results suggest that the VisRH two-component  
40 system senses IAV-induced stress conditions and controls adaptive responses that allow survival  
41 of *S. pneumoniae* in IAV-infected pneumocytes.

## 42 **Author summary**

43 *S. pneumoniae* is an inhabitant of the human nasopharynx that is capable of causing a variety of  
44 infections contributing to an estimated 1.6 million deaths each year. Many of these deaths occur  
45 as result of secondary *S. pneumoniae* infections following seasonal or pandemic influenza.  
46 Although *S. pneumoniae* is considered a typical extracellular pathogen, an intracellular survival  
47 mechanism has been more recently recognized as significant in bacterial pathogenesis. The  
48 synergistic effects between influenza A and *S. pneumoniae* in secondary bacterial infection are  
49 well documented; however, the effects of influenza infections on intracellular survival of *S.*  
50 *pneumoniae* are ill-defined. Here, we provide evidence that influenza infection increases *S.*  
51 *pneumoniae* intracellular survival in pneumocytes. We demonstrate that the poorly understood  
52 VisRH signal transduction system in pneumococcus controls the expression of genes involved in  
53 the stress response that *S. pneumoniae* needs to increase intracellular survival in influenza A-

54 infected pneumocytes. These findings have important implications for understanding secondary  
55 bacterial pathogenesis following influenza and for the treatment of such infections in influenza-  
56 stricken patients.

57

## 58 **Introduction**

59 The World Health Organization (WHO) estimates that seasonal influenza virus infections result in  
60 about 1 billion infections, 3 to 5 million cases of severe disease, and between 300,000 and  
61 500,000 deaths around the world every year. Oftentimes, influenza infections are complicated by  
62 secondary bacterial infections, particularly caused by *S. pneumoniae*. About 11-35% of  
63 laboratory-confirmed cases of influenza infection are associated with secondary *S. pneumoniae*  
64 infections [1]. Such secondary infections ultimately exacerbate the severity of respiratory  
65 symptoms resulting in excess morbidity and mortality [2,3]. Highlighting the importance of *S.*  
66 *pneumoniae*, it has been proposed that the majority of 40-50 million deaths during the 1918  
67 Spanish influenza pandemic were associated to *S. pneumoniae* secondary bacterial infections  
68 [4,5]. The *S. pneumoniae* is a Gram-positive bacterium of great significance on human health,  
69 being the causal agent of otitis, sinusitis, as well as severe diseases such as community-acquired  
70 pneumonia, sepsis, and meningitis [6]. More recently, about 34% of the deaths associated with  
71 the 2009 pandemic influenza were also linked to secondary bacterial infections, with *S.*  
72 *pneumoniae* as the most commonly associated bacterial pathogen (in addition to *Staphylococcus*  
73 *aureus* and *Streptococcus pyogenes*) [7,8].

74 A myriad of concomitant events and factors are thought to be associated with the promotion of  
75 secondary bacterial infections following infection with influenza virus: 1) influenza infections  
76 produce damage of pulmonary epithelial cells, decreasing the mucociliary clearance and favoring  
77 bacterial adherence and infection [9]; 2) the virus' neuraminidase results in the desialylation of  
78 mucins, which increases pneumococcal adherence [10]; and 3) macrophages and neutrophils  
79 infected with influenza virus show impaired phagocytosis of pneumococci [11]. Although these  
80 and perhaps other virus-induced modifications on different host cells and tissues [1-3,8,12] can

81 contribute to secondary *S. pneumoniae* infections, the precise molecular mechanisms of  
82 synergism between influenza viruses and *S. pneumoniae* remain poorly understood.

83 *S. pneumoniae* is considered a typical extracellular pathogen. However, mounting evidence  
84 suggests a significant role of the replication and survival *S. pneumoniae* inside host cells for  
85 disease progression and pathogenesis. In this regard, Ercoli *et al* [13] described that intracellular  
86 replication of *S. pneumoniae* in splenic macrophages acts as a bacterial reservoir for septicemia.  
87 Ogawa *et al* [14] characterized autophagic vesicles that contain pneumococci during the first  
88 hours of bacterial infection of human nasopharyngeal epithelial cells and mouse embryonic  
89 fibroblasts. The same work also showed that the bacterial protein Ply, a cholesterol-binding,  
90 thiol-activated cytolysin, provides advantages for the bacteria to escape from endosomal  
91 elimination at early stages of infection. We previously reported that the two-component systems  
92 (TCSs) ComDE and CiaRH are involved in the pneumococcal stress response to acidic  
93 conditions and in the intracellular survival of *S. pneumoniae* in pneumocytes [15]. In addition, we  
94 recently reported that the crosstalk signaling between the serine/threonine kinase StkP and  
95 ComE controls H<sub>2</sub>O<sub>2</sub> production in *S. pneumoniae* modulating its intracellular survival in  
96 pneumocytes [16].

97 In this report, we studied how IAV infection affects the intracellular survival of *S. pneumoniae* in  
98 an in vitro pneumocyte IAV-*S. pneumoniae* superinfection model. We observed that *S.*  
99 *pneumoniae* exhibits increased intracellular survival in IAV-infected cells. In *S. pneumoniae*, we  
100 identified the two-component system VisRH as a mediator of such increased survival. We found  
101 that VisRH controls the expression of 179 pneumococcal genes, such as *clpL* and *psaB*, which  
102 encode a molecular chaperone and a Mn<sup>+2</sup> transporter, respectively. We show that *clpL* and *psaB*  
103 expression is required in response to acidic and oxidative stress and for bacterial survival in IAV-  
104 infected pneumocytes.

105

## 106 **Results**

### 107 **Enhanced intracellular survival of *S. pneumoniae* in influenza virus-infected pneumocytes**

108 We previously demonstrated that the *S. pneumoniae* R801 strain can survive inside pneumocytes  
 109 for several hours [16]. To further define whether a concomitant influenza virus infection would  
 110 affect *S. pneumoniae* intracellular survival, we established an in vitro IAV-*S. pneumoniae*  
 111 superinfection model in human-derived A549 pneumocyte cells. As a model virus, we utilized the  
 112 laboratory-adapted influenza A/Puerto Rico/8/1934 (H1N1) virus (IAV), which has been  
 113 extensively shown to infect A549 cells [17]. A549 cells were inoculated with a multiplicity of  
 114 infection (MOI) of either 1, 5, or 10 of the IAV strain. Virus replication was allowed to progress for  
 115 24 h before infection with the *S. pneumoniae* R801 strain at a MOI of 30. Flow cytometry using  
 116 Annexin-V-ACP/PI labeling to test necrosis/apoptosis levels revealed that a MOI of 10 of IAV led  
 117 to ~5% increase in the number of necrotic/apoptotic cells compared to non-infected cells (Fig  
 118 S1A) and ~15% after bacterial superinfection using a bacterial MOI of 30 (Fig S1B), as described  
 119 [16]. In further studies, we used IAV at a MOI of 10 and *S. pneumoniae* at a MOI of 30 in the  
 120 superinfection model. Gentamicin was used to eliminate extracellular bacteria before evaluation  
 121 of intracellular *S. pneumoniae* following the classical protection assay [16]. Prior IAV inoculation  
 122 consistently increased bacterial survival by ~2 fold in A549 pneumocytes (Fig 1A). The synergism  
 123 between these two pathogens, as defined in this case as enhanced *S. pneumoniae* survival in  
 124 IAV-infected cells, was also observed in mouse embryonic fibroblasts (MEF) and in cervical  
 125 cancer cells (HeLa) (Fig 1A), suggesting that this phenomenon is cell-line independent.

126 **The VisRH two-component system mediates enhanced pneumococcal survival in**  
 127 **influenza-infected cells.** *S. pneumoniae* requires ComE and CiaR response regulators to  
 128 control the acid stress response and intracellular survival in non-IAV infected A549 pneumocytes  
 129 [15,16]. We hypothesized that pneumococcal two-component systems (TCSs) sense  
 130 physiological changes induced by IAV-infection of pneumocytes and mediate adaptive  
 131 responses that lead to increased intracellular bacterial survival. Next, we considered that the  
 132 intracellular changes induced by IAV-infection generate stress conditions sensed by *S.*  
 133 *pneumoniae* via TCSs other than ComE and CiaR [15,16]. From a previous systematic screening  
 134 of insertion-duplication histidine kinase (*hk*) mutants of *S. pneumoniae* [15] (Table S1), we  
 135 focused the search on *hk* mutations that were null for pneumococcal intracellular survival in the

136 absence of IAV infection. When non-IAV infected A549 pneumocytes were inoculated with the *S.*  
 137 *pneumoniae* *hk* mutants, most of them showed no changes in intracellular survival compared to  
 138 the *wt* strain, including the *hk01::ery* mutant (Fig S2). However, in the context of IAV infection, the  
 139 *hk01::ery* mutant showed impaired pneumococcal intracellular survival compared to the *wt* strain  
 140 (Fig 1B), indicating that their components participate in sensing the IAV-infected environment.  
 141 The *hk01::ery* mutant corresponds to TCS01, one of the least studied TCSs but previously  
 142 identified as a virulent marker in *S. pneumoniae* [18-20]. TCS01, hereafter renamed VisRH (for  
 143 virus-induced stress) contains the VisH histidine kinase and the VisR response regulator.  
 144 Deletion mutants for the *visR* ( $\Delta visR$ ) and *visH* ( $\Delta visH$ ) genes obtained using the Janus cassette  
 145 [21] (Table S1), showed similar impairment in intracellular survival as the *hk01::ery* mutant  
 146 compared to the *wt S. pneumoniae* strain in IAV-infected A549 pneumocytes (Fig 1B). In  
 147 contrast, the reconstructed revertant of the  $\Delta visR$  mutant (*wr visR<sup>+</sup>*) recovered the *wt* phenotype  
 148 (Fig 1B). These results confirmed that *S. pneumoniae* needs VisRH for increased intracellular  
 149 survival in IAV-infected A549 pneumocytes.

#### 150 **VisRH controls the acidic stress response of *S. pneumoniae***

151 *S. pneumoniae* needs an acidic stress response for intracellular survival in pneumocytes [15,16]  
 152 and survives in acidic autophagic vesicles of Detroit 562 human nasopharyngeal epithelial cells  
 153 and in mouse embryonic fibroblasts (MEFs) [14]. In IAV-infected cells, *S. pneumoniae* is likely to  
 154 survive in acidic autophagic vesicles, which implies exposure to the acidic environment and  
 155 increased ROS production induced by IAV [14]. Since bacterial TCSs typically respond to  
 156 changes in environmental conditions, we hypothesized that VisRH senses IAV-induced  
 157 physiological changes at the intracellular level, resulting in an adaptive stress response that  
 158 improves *S. pneumoniae* survival in autophagic vesicles in IAV-infected pneumocytes [22]. The  
 159  $\Delta visR$  mutant was incubated in culture media at pH 4.8 for 1 h showing a 10<sup>3</sup>-fold decrease in  
 160 bacterial cell viability compared to the *wt*. In contrast, the *wr visR<sup>+</sup>* revertant recovered the acidic  
 161 tolerance (Fig 2A). The  $\Delta visR$  mutant behaved similarly as the control *atpC<sup>A49T</sup>* mutant, which  
 162 contains a point mutation at position 49 of the subunit  $\epsilon$  of the F<sub>0</sub>F<sub>1</sub>-ATPase (a proton pump that  
 163 controls intracellular pH) and is unable to respond to acidic stress in acidified media [15,23].

164 These results suggest that VisRH is required for the acidic stress response of *S. pneumoniae*.  
 165 To further define the role of vesicle acidification in *S. pneumoniae* survival, A549 cells were  
 166 treated with Bafilomycin A1 (100 nM, 3h), a known v-ATPase inhibitor that halts lysosomal  
 167 acidification [24] and prevents the fusion between endosome/autophagosome and lysosome, and  
 168 simultaneously inoculated with *S. pneumoniae*. Intracellular survival of the pneumococcal *wt*  
 169 strain showed a significant increase when A549 cells were exposed to Bafilomycin A1, as  
 170 described [25]. In contrast, when Bafilomycin A1-treated or non-treated A549 pneumocytes were  
 171 infected with either the control *atpC*<sup>A49T</sup> mutant or the  $\Delta visR$  mutant cells (Fig 2B), *S. pneumoniae*  
 172 showed no increased survival suggesting that the  $\Delta visR$  mutant is unable to respond to the pH  
 173 variation in vesicles. Since IAV infection also leads to inhibition of the autophagosome/lysosome  
 174 fusion step [26], VisRH is likely involved in the regulation of stress genes required for  
 175 pneumococcal adaptation to IAV-induced acidic stress conditions.

#### 176 **VisRH is involved in the oxidative stress response of *S. pneumoniae***

177 In a separate study, we previously reported that the StkP/ComE pathway is involved in the  
 178 regulation of the oxidative stress response that affects the intracellular survival of *S. pneumoniae*  
 179 in pneumocytes [16]. Additionally, previous reports had indicated that the oxidative stress  
 180 response is controlled by TCS04 [27], suggesting a complex regulatory system that likely involves  
 181 the participation of other signal transduction systems. To test the putative role of VisRH in the  
 182 oxidative stress response of *S. pneumoniae*, we examined the hydrogen peroxide resistance of  
 183 the  $\Delta visR$  mutant (20 mM H<sub>2</sub>O<sub>2</sub> in BHI media for 1 h), which was reduced by approximately 30  
 184 times while the *wr visR*<sup>+</sup> (revertant) displayed a hydrogen peroxide resistance similar to *wt* (Fig  
 185 2C). As a control, we tested the  $\Delta sodA$  mutant (Table S1), a strain deficient in the oxidative stress  
 186 response that displayed a 10-fold decrease in H<sub>2</sub>O<sub>2</sub> resistance compared to the *wt* (Fig 2C)  
 187 [28,29]. These observations suggest a role of VisRH in the oxidative stress response. IAV-  
 188 infection of A549 cells leads to enhanced reactive oxygen species (ROS) production and  
 189 alteration of the antioxidant defense [30,31]. By measuring the intracellular ROS levels using  
 190 H<sub>2</sub>DCF-DA, we reproduced this phenotype in our model. We found that ROS production  
 191 increased by 33% in IAV-infected cells compared to mock-infected cells (Fig S3). In this context,  
 192 the intracellular survival of the  $\Delta visR$ ,  $\Delta sodA$  and *wt* strains was determined in IAV-infected A549



cells. Both the  $\Delta visR$  and  $\Delta sodA$  mutants showed reduced survival rates compared to the wt in IAV-infected cells (Fig 2D), suggesting that VisRH oxidative stress response is relevant for the viral-bacterial synergism. To further explore the effects of ROS production on the intracellular survival mechanism of *S. pneumoniae*, A549 cells were treated with 5 mM N-acetyl-L-cysteine (NAC, 1h prior to *S. pneumoniae* inoculation), a potent ROS inhibitor [32]. In the absence of IAV infection, the NAC-treated A549 cells lead to increased survival of the *S. pneumoniae* wt strain (~2-fold) compared to non-NAC-treated A549 cells. In contrast, the  $\Delta visR$  and  $\Delta sodA$  mutants were less sensitive to the effects of low ROS biosynthesis (inhibited by NAC). Overall, VisRH likely senses ROS production to activate an oxidative stress response that allows *S. pneumoniae* to survive into autophagosomes.

### **VisR regulates expression of pneumococcal stress genes**

Bacterial response regulators control gene expression to develop an adaptive response to stress conditions [22]. In order to identify the VisR-regulated genes, we compared the transcriptomes of the  $\Delta visR$  and wt strains by RNAseq analysis. These strains were grown in acidified media at the exponential growth phase, and total RNA was purified and analyzed as described [16]. The transcriptomic analysis revealed the differential expression of 179 genes, 65 were down-regulated and 114 were up-regulated (Fig S4; Table S2; Fig 3A). We identified that VisR controls, directly or indirectly, the expression of stress genes such as those coding for molecular chaperones, redox homeostasis, as well as genes involved in cation and metabolite transport, cell wall biosynthesis, amino acid biosynthesis, purine/pyrimidine, central metabolism, ribosomal and translation structures, among others (Fig. 3B and Table S2). The expression of *visH* showed a 3-fold decrease in the  $\Delta visR$  mutant, suggesting that the VisRH TCS is auto-regulating its own genes (Fig 3C).

We focused on stress genes and confirmed by RT-qPCR that in the  $\Delta visR$  mutant there was decreased expression of *visH* (17.9 times), *clpL* (3.9 times) and *psaB* (2.4 times), and increased transcription of *murN* (2.3 times), *glyA* (3.2 times), and *aroC* (3 times) compared to the wt (Fig 3C). The *clpL* gene encodes for a molecular chaperone (heat shock protein) involved in stress response [33,34], *murN* encodes for an enzyme of cell-wall biosynthesis [35], *glyA* encodes for a glycine hydroxymethyltransferase [36], *psaB* encodes for a subunit of a manganese ABC



222 transporter related to oxidative resistance [27,29], and *aroC* encodes for chorismate synthase  
223 involved in aromatic amino acid biosynthesis in bacteria [37].

224 To determine a putative correlation between the transcript and the protein levels, we compared  
225 the proteomes of the  $\Delta visR$  mutant and *wt*. We used protein extracts obtained from bacterial cells  
226 grown in the same conditions described for RNAseq assays. By LC-MS/MS, we detected 925  
227 proteins in total, we found differential expression of 33 down-regulated and 33 up-regulated  
228 proteins, and we confirmed the absence of VisR in the  $\Delta visR$  mutant (Fig 4A). The full list of  
229 differentially expressed proteins is available (Table S3), and a volcano plot showed proteins  
230 differentially expressed with a fold change greater than 2 (Fig S5). When these data were  
231 compared with those obtained by RNAseq analysis, we obtained a correlation between the  
232 expression of the *clpL*, *psaB*, *dpr* (codes an iron-containing ferritin) [38], *trxA* (encodes for a  
233 thioredoxin) [39], *groES* (codes for molecular chaperones) [40], and *nrdD* (codes for a  
234 ribonucleotide reductase) [41] genes with the expression of their corresponding encoded proteins  
235 (Fig 4B). We found that expression of ClpL and PsaB are repressed in the  $\Delta visR$  mutant, and  
236 these proteins have been previously involved in stress response in *S. pneumoniae* [29,34].

237

## 238 **ClpL and PsaB are involved in the pneumococcal stress response and in the synergistic** 239 **mechanism between influenza A and *S. pneumoniae***

240 Since the RNAseq and proteomic data pointed to many stress-related genes under control of  
241 VisRH, we focused our study in two particular stress genes, *clpL* and *psaB*. The *clpL* gene codes  
242 for a chaperone that is known to be induced by heat shock [33,34]. However, experimental  
243 evidence showed ClpL is mainly induced under acidic stress (Fig S6). SDS-PAGE comparison of  
244 protein extracts from cells grown in ABM (pH 7.8) or incubated in ABM (pH 5.9) showed  
245 increased expression of a 78-kDa band under acidic conditions (Fig S6A). Protein sequencing of  
246 this band revealed two peptides of 11 and 14 amino acids with 100% homology with the amino  
247 acid sequence of ClpL (Fig S6B). ClpL is predicted to have 701 amino acids and a theoretical  
248 molecular weight of 77.6 kDa, in line with our observations in SDS-PAGE (78-kDa). To analyze  
249 the *clpL* transcript levels under acidic conditions, the *wt* cells were exposed at either pH 5.9 or pH

250 7.8, and total RNA was purified and treated as described [16]. We detected an increase of 70  
251 times in the *clpL* transcript when cells were exposed to pH 5.9 (Fig 5A) indicating that the rise in  
252 ClpL expression is linked to adaptive changes at transcriptional levels that are triggered under  
253 acidic conditions.

254 To define the role of ClpL in the pneumococcal stress response, we constructed a  $\Delta clpL$  mutant  
255 (Table S1), which displayed a decrease of  $10^4$  times in its tolerance to acidified media (exposure  
256 to THYE pH 4.8 for 1 h) compared with the *wt* (Fig 5B). This mutant had the same acid sensitivity  
257 as the  $\Delta visR$  mutant, as showed before. With the purpose to determine the effect of oxidative  
258 stress, the  $\Delta clpL$  cells were also exposed to  $H_2O_2$ , which displayed a reduction in  $H_2O_2$   
259 susceptibility of 200 times compared with *wt*, indicating that this chaperone is not only a heat  
260 shock protein [33] but is also involved both in acidic and oxidative stress responses (Fig 5C).

261 To determine the contribution of ClpL in our cellular infection model, A549 cells were infected with  
262 the  $\Delta clpL$  mutant, and it displayed that its intracellular survival capacity was similar to *wt*.  
263 However, when A549 cells were treated with 100 nM Bafilomycin A1 or were previously infected  
264 with IAV, conditions that expose pneumococci to the acidic environment of autophagosomes, the  
265  $\Delta clpL$  mutant did not show an increased survival as *wt* did (Fig 5D). Altogether, these findings  
266 indicate that ClpL is involved in the acidic stress response, which is in turn required for increased  
267 intracellular survival of *S. pneumoniae* in IAV-infected pneumocytes.

268 Based in the RNAseq assays, we were also interested in the *psaB* gene that encodes for a  $Mn^{+2}$   
269 transporter in *S. pneumoniae*. It was reported that the  $\Delta psaB$  mutant displays susceptibility to  
270 oxidative stress [29]. We hypothesized that lack of *psaB* could influence the intracellular survival  
271 of *S. pneumoniae* in IAV-infected cells due to the virus' ROS production. The  $\Delta psaB$  mutant strain  
272 was 400-fold more sensitive to acidic stress (Fig 5C) and showed  $10^4$  times more susceptibility to  
273 20 mM  $H_2O_2$ , in line with previous studies [28,29]. In contrast to the  $\Delta clpL$  mutant,  $\Delta psaB$   
274 displayed an impaired intracellular survival in non-IAV infected cells (Fig 5E). However, both  
275 mutants failed to exhibit increased intracellular survival in IAV-infected or NAC-treated A549 cells,  
276 resembling the phenotype observed for the  $\Delta visR$  mutant (Fig 5E). These observations confirm  
277 that ClpL and PsaB are necessary for the IAV-*S. pneumoniae* synergistic mechanism.

## 278 **Influenza A-S. pneumoniae synergism occurs only in autophagy-proficient cells**

279 Previous reports showed that IAV induces autophagy but blocks the last step of the autophagic  
 280 process [26] [42]. *S. pneumoniae* [14,43] also induces autophagy but survives in autophagic  
 281 vesicles [14]. In order to determine whether autophagy is affected in our IAV-*S. pneumoniae*  
 282 superinfection model, the potential increased accumulation of LC3-II due to autophagy inhibition  
 283 was evaluated. As controls of autophagy assays, A549 cells treated with either Bafilomycin A1, a  
 284 well-known inhibitor of the late phase of autophagy as well [44], or rapamycin, a well-known  
 285 autophagy inducer [45] showed increased LC3-II levels by Western blot analysis (Fig S7A-B).  
 286 When A549 cells were infected with either the IAV, the pneumococcal *wt* strain, or superinfected,  
 287 increased LC3-II levels were observed (Fig S7A-B), consistent with previous results [46]. In a  
 288 separate study, mKate2-hLC3 vectors [47] were transfected into A549 cells and subsequently  
 289 infected by either IAV, *S. pneumoniae* or superinfected. Confocal microscopy results indicated  
 290 that any of these treatments induced remarkably high mKate2-hLC3 punctation in A549 cells (Fig  
 291 S7C), indicating autophagy induction.

292 To confirm the functional role of autophagy in this viral-bacterial synergism, IAV-infected mouse  
 293 embryonic fibroblasts (MEF *atg5-KO*), which are deficient in autophagy [48], were superinfected  
 294 with the pneumococcal *wt* strain. As control, similar treatments were performed in the parental  
 295 cell line (MEF *wt*), which are autophagy-proficient cells. A significant increase in the intracellular  
 296 survival of *S. pneumoniae* in IAV-infected MEF cells was observed similar to that observed in  
 297 A549 cells (Fig 6A). In contrast, *S. pneumoniae* superinfection of IAV-infected MEF *atg5-KO* cells  
 298 showed a significant decrease in bacterial intracellular survival compared to the bacterial infection  
 299 only (Fig 6B). Similarly, the  $\Delta visR$  mutant showed lower intracellular survival in non-IAV infected  
 300 MEFs *atg5-KO* relative to non-IAV infected MEFs *wt*, although it was equally deficient in both  
 301 MEFs *wt* and MEFs *atg5-KO* previously infected with IAV (Fig 6A-B), as observed in IAV-infected  
 302 A549 cells. Altogether, these results suggest that VisRH mediates the synergistic mechanism  
 303 between IAV and *S. pneumoniae* and that this phenomenon occurs only in autophagy-proficient  
 304 cells.

## 305 Discussion

306 Although *S. pneumoniae* is a common extracellular colonizer of the human nasopharynx, it is  
 307 known to cause otitis, sinusitis and invasive infections such as pneumonia, bacteremia, and  
 308 meningitis. Bacterial pneumonia caused by *S. pneumoniae* in patients infected with influenza A  
 309 has significant relevance in human health during seasonal and pandemic influenza. IAV  
 310 infections cause physical and physiological changes in the respiratory epithelium that facilitate  
 311 secondary bacterial infections [10]. Recent reports suggest that such infections are associated  
 312 with the pneumococcal ability to survive intracellularly. In this regard, Ogawa described  
 313 intracellular fates of *S. pneumoniae* and found that it is entrapped in specific autophagic vesicles  
 314 in MEFs [14], which is consistent with our pneumocyte infection model [16]. In the present work,  
 315 we expanded these studies and found that intracellular pneumococcal survival is clearly improved  
 316 in IAV-infected pneumocytes.

317 Many bacterial TCSs, have been involved in intracellular survival mechanisms in eukaryotic cells,  
 318 such as EvgSA in *Shigella flexneri* [49]; ArcAB [50], PhoPQ [51] and EnvZ/OmpR [52] in  
 319 *Salmonella typhimurium*; SrrAB [53]; GraSR [54] in *Staphylococcus aureus*; PhoPQ in  
 320 *Escherichia coli* [55]; BvrSR in *Brucella abortus* [56]; and PrrAB in *Mycobacterium tuberculosis*  
 321 [57], among others. In *S. pneumoniae*, most of the TCSs are required for full virulence in animal  
 322 models of infection [58,59] and we have shown that two of these systems, StkP/ComE and  
 323 CiaRH [15,16], are important in response to acidic and/or oxidative stress. The poorly studied  
 324 VisRH system (TCS01) has been previously involved in mediating virulence in intranasally-  
 325 infected mice [18,19], and a rabbit endocarditis model [20]; however, the effects on intracellular  
 326 pneumococcal survival were not explored. Here, we show that the intracellular pneumococcal  
 327 survival of the  $\Delta visR$  mutant is similar to the *wt* in A549 pneumocytes, suggesting that this system  
 328 may not be directly linked to virulence in animal models.

329 A key finding of our work was that VisR, as well as ClpL and PsaB, are involved in the stress  
 330 response induced by *S. pneumoniae* and are necessary for the increased pneumococcal survival  
 331 in IAV-infected cells. ClpL was formerly described as a heat-shock chaperone induced in  
 332 pneumococcal cells when incubated at 45°C [34]. The  $\Delta clpL$  mutant is temperature sensitive (to

333 43°C) but virulence remains unaffected in a murine intraperitoneal model [60]. We observed that  
 334 ClpL is mostly induced at pH 5.9 in the *wt* strain. In contrast, the  $\Delta clpL$  mutant does tolerate an  
 335 acidic pH of  $\geq 4.8$  in bacterial culture media. A similar phenotype was reported for *Streptococcus*  
 336 *mutans* where ClpL was also induced at pH 5.0 and it was essential for the acid tolerance  
 337 response [61]. We also found that the  $\Delta clpL$  mutant displayed susceptibility to hydrogen peroxide,  
 338 indicating that ClpL is likely a chaperone involved not only in thermal but also acidic and oxidative  
 339 stress responses. Previous reports showed that ClpL's activity is  $Mn^{+2}$ -dependent [62], further  
 340 adding to its potential relevance of these proteins in the general stress response of *S.*  
 341 *pneumoniae*. Our studies suggest that that ClpL is a key chaperone related to the general stress  
 342 response of *S. pneumoniae* and essential for bacterial intracellular survival in IAV-infected cells.

343 PsaB was previously described as an ATP-binding protein that belongs to the ABC-type  
 344 manganese permease [63]. Mutations on the genes that constitute the *psaBCA* operon result in  
 345 growth limitations in culture media with low  $Mn^{+2}$  concentration, and attenuation in four different  
 346 animal models of infection [64]. The PsaBCA complex is indeed a  $Mn^{+2}$  transporter and its protein  
 347 components are involved in virulence, resistance to hydrogen peroxide and superoxides [29]. The  
 348 *psaBC* mutant shows hypersusceptibility to hydrogen peroxide and superoxides [65]. We  
 349 observed the same phenotype in our  $\Delta psaB$  mutant, confirming that this strain is more  
 350 susceptible to exogenous hydrogen peroxide than the *wt* strain. Since the *S. pneumoniae*  $\Delta visR$ ,  
 351  $\Delta clpL$  and  $\Delta psaB$  mutants showed alterations to both acidic and oxidative stress conditions, it  
 352 suggests a common strategy to general stress adaptation that involves, at least, a TCS, a  
 353 chaperone and a  $Mn^{+2}$  transporter. Such cross-response mechanisms are not unique to *S.*  
 354 *pneumoniae*. In *Streptococcus mutans*, a cross-response effect between acidic and oxidative  
 355 stress was reported for a mutant of the oxidative stress regulator SpxA. Similar to the *S.*  
 356 *pneumoniae*  $\Delta visR$  mutant, the *spxA* mutation impairs *S. mutans*' ability to grow under acidic and  
 357 oxidative conditions [66].

358 We observed that VisR controls transcription of the *clpL* and *psaB* genes by unknown  
 359 mechanisms. The VisR response regulator modulates the acidic/oxidative stress response of *S.*  
 360 *pneumoniae* to improve intracellular survival in influenza-infected cells. However, transcription of

the *clpL* and *psaB* genes could be co-regulated by other regulators [62]. For example, the conserved repressor CtsR regulates the *clpL* expression in many streptococci and lactococci, and these bacteria present CtsR box elements in the *clpL* promoter region [62]. In *S. pneumoniae*, CtsR-binding sites were located upstream from the *clpL* gene [67], however, its regulation has not been yet elucidated. Based on the qPCR assays, we suggest that the *clpL* expression is induced by acidic pH and controlled by VisR, but we cannot discard the possibility that other regulators such as CtsR modulate ClpL stress response in *S. pneumoniae*. Equally complex appears to be the regulation of the *psaB* gene. Expression of the *psaBCA* operon is controlled by the PsaR regulator in a  $Mn^{+2}$ -dependent manner [68]. In addition, RR04, which belongs to the TCS04, is necessary for the activation of the *psaBCA* locus [27]. Here, we demonstrate that VisR is also essential for the transcriptional activation of the *psaB* gene, adding to complexity of this regulation.

Regarding the increased intracellular survival of *S. pneumoniae* in IAV-infected A549 cells, it is clear that VisR is necessary in IAV-infected cells but not in non-infected cells. It is likely that IAV infection produces stress conditions in pneumocytes that *S. pneumoniae* overcomes in a VisRH-dependent manner, to improve its capacity to survive intracellularly. Based on the bacterial survival assay in acidified media, where the  $\Delta visR$ ,  $\Delta clpL$  and  $\Delta psaB$  cells showed impaired acidic tolerance, we suggest that *S. pneumoniae* needs an adaptive process to survive under acidic conditions, such in acidic vesicles in IAV-infected pneumocytes. Taking into account that ClpL expression is induced at pH 5.9 in the *wt* strain and that the  $\Delta visR$  cells show decreased ClpL and PsaB expression, VisRH is likely sensing acidic stress and modulating adaptation to such condition (Fig 7).

Related to the putative role of oxidative stress in the synergistic mechanism between IAV and *S. pneumoniae*, it is known that IAV infection increases ROS production in A549 cells [69]. It was reported that *S. pneumoniae* induces an oxidative stress response to survive under oxidative conditions [70]. Analyzing the list of VisR-regulated genes, we focused our attention on the *psaB* gene that encodes for a  $Mn^{+2}$  transporter involved in oxidative stress response in *S. pneumoniae* [29,71]. It was described that the  $\Delta psaB$  mutant was very sensitive to hydrogen peroxide, and this

389 probably occurs due to a low  $Mn^{+2}$  level that affects the SodA activity [71]. In view of our results,  
 390 VisR controls, directly or indirectly, *psaB* transcription affecting the oxidative stress tolerance  
 391 apparently supported by SodA. To confirm this hypothesis, we tested the  $\Delta sodA$  mutant and we  
 392 found the same phenotype that the  $\Delta visR$  and  $\Delta psaB$  mutants, which showed increased  
 393 susceptibility to hydrogen peroxide. Curiously, the  $\Delta clpL$  mutant also displayed an impaired  
 394 hydrogen peroxide tolerance, suggesting that ClpL is essential for general stress response.  
 395 Regarding a putative cross stress response, it is important to highlight that ClpL is a  $Mn^{+2}$ -  
 396 dependent chaperone [33], in consequence, there is a direct association with the PsaB  $Mn^{+2}$   
 397 transporter. Probably, in the  $\Delta psaB$  mutant, the observed decreased tolerance to acidic pH that  
 398 corresponds to diminished activity of ClpL is also due to a low  $Mn^{+2}$  level.

399 The importance of oxidative stress response in the intracellular survival mechanism of *S.*  
 400 *pneumoniae* was revealed when ROS production was inhibited in A549 cells by a NAC treatment  
 401 during bacterial infection. Under these conditions, we clearly observed that the *wt* strain  
 402 increased its survival, as described for A549 cells [43], indicating that *S. pneumoniae* must  
 403 overcome this type of stress to survive intracellularly and that this pathogen is susceptible to  
 404 changes in ROS levels. In the intracellular context of IAV-infected pneumocytes, this virus is able  
 405 to increase ROS production [31] and, to achieve synergism, *S. pneumoniae* should be also able  
 406 to overcome oxidative stress.

407 Our results indicate that the lack of PsaB impaired the intracellular survival of *S. pneumoniae*,  
 408 even in non-IAV infected cells, probably because  $Mn^{+2}$  is needed in for many bacterial processes  
 409 [72]. In contrast, VisR and ClpL were not essential for this survival mechanism but VisR, ClpL,  
 410 and PsaB were found to be necessary for the synergism detected in *S. pneumoniae* in IAV-  
 411 infected A549 cells. We propose that *S. pneumoniae* needs to induce a VisR-controlled adaptive  
 412 process during superinfection to express chaperones, such as ClpL, to refold proteins denatured  
 413 by acidic stress and by the IAV-induced ROS production [31], and  $Mn^{+2}$  transporter to provide this  
 414 metal that is essential for chaperone activity, among other cellular processes (Fig 7).

415 As mentioned before, Gannage *et al* [26] reported that IAV infection produced accumulation of  
 416 autophagosome by IAV M2-induced blockage of fusion with lysosomes. On the other hand,



Ogawa *et al.* [14] reported that *S. pneumoniae* is able to survive in autophagic vesicles. Based on these findings, we hypothesized that the IAV-*S. pneumoniae* synergism may depend on the autophagic process. This putative autophagy-dependence was confirmed using the MEF cell line, with which we reproduced the same synergism found in A549 cells, but not in the MEF *atg5*-KO cells that are deficient in autophagy, indicating that this synergistic mechanism occurs only in autophagy proficient cells.

Pneumococcal pathogenesis has been studied extensively in the last decades. Although *S. pneumoniae* is considered a typical extracellular pathogen, particular attention has been given to the intracellular survival mechanism in the last years, as mentioned before [15,16] [13,14]. In this work, we report for the first time that the intracellular survival of *S. pneumoniae* is enhanced in IAV-infected cells, and this synergism occurs in autophagic-proficient cells. For this survival, *S. pneumoniae* needs a physiological adaptation to IAV-induced conditions, and we propose that the VisRH TCS probably senses these changes at intracellular level and controls the expression of ClpL and PsaB, which are needed to tolerate the acidic pH found in intracellular vesicles, as well as the increased ROS level produced by influenza A.

We consider that our results contribute to the knowledge of the intracellular survival mechanism of *S. pneumoniae* in the context of eukaryotic cells infected with influenza A, with a consequent relevance for the management of secondary infections in influenza-infected patients. We propose that intracellular antibiotics should be also considered for the treatment of pneumococcal infections during an epidemic or pandemic influenza A. Many works have described this particular viral-bacterial synergism [1,8-11], and here we provide experimental evidence on how influenza A infections enhance the intracellular survival of *S. pneumoniae*.

## Materials and methods

### Bacterial and viral strains, plasmids, cell lines, and growth conditions

All bacterial strains, oligonucleotides and plasmids used in this study, as well as cloning and mutagenesis procedures, are listed in the supplementary material (Table S1). Oligonucleotide synthesis and DNA sequencing service were performed in Macrogen Inc. (Seoul, South Korea).

444 The growth conditions and stock preparation for the pneumococcal and *Escherichia coli* strains  
445 have been reported elsewhere [23], and the transformation assays have been previously  
446 described [23,73]. The influenza virus A/Puerto Rico/8/1934 (H1N1) (IAV) strain was used for  
447 superinfection assays. Viruses were grown in embryonated chicken eggs, and the allantoic fluid  
448 was collected, aliquoted, titrated in Madin-Darby canine kidney cells (50% tissue culture infective  
449 doses [TCID<sub>50</sub>]) and eggs (50% egg infective dose [EID<sub>50</sub>]), and stored at –80°C until used [74].

#### 450 **Cell lines and culture conditions**

451 The A549 cell line (human lung epithelial carcinoma, pneumocytes type II; ATCC® CCL-185™)  
452 was cultured at 37°C, 5% CO<sub>2</sub> in Dulbecco's modified Eagle medium (DMEM) with 4.5 g/l of  
453 glucose and 10% of heat-inactivated fetal bovine serum (FBS) (Gibco BRL, Gaithersburg, Md.).  
454 Fully confluent A549 cells were split once every two or three days via trypsin/EDTA treatment and  
455 diluted in fresh media before being cultivated in Filter cap cell flasks of 75 cm<sup>2</sup> (Greiner Bio-one  
456 no. 658175) until passage 6, as described [16]. A549 cells were transfected/co-transfected with  
457 pIRES2-EGFP and pIRES2-M2 using JetPRIME® (Polyplus-transfection, Illkirch, France)  
458 following the manufacturer's instructions in serum-free DMEM (Invitrogen) supplemented with 5%  
459 of Fetal Bovine Serum (FBS). The MEF (Mouse Embryonic Fibroblast) and the autophagy-  
460 deficient MEF *atg5-KO* cell lines were generously provided by Dr. Noboru Mizushima [48]. These  
461 cell lines were cultured under the same conditions as described for A549 cells. The mKate2-LC3  
462 plasmids [47] was obtained from Addgene.

#### 463 **Intracellular survival assays**

464 The intracellular survival assays of pneumococci were performed as reported previously [15,16]  
465 with modifications. Briefly, approximately  $1.5 \times 10^5$  of eukaryotic cells (A549, MEF, MEF *atg5-KO*,  
466 or HeLa cell lines) per well were seeded in 12 well plates and cultured in DMEM (with 5% FBS)  
467 and incubated at 37°C for 24 h. Pneumococci were grown in THYE to the mid-log phase (OD<sub>600nm</sub>  
468 0.3) and resuspended in DMEM (with 5% FBS). Infection of cell monolayers was carried out  
469 using a multiplicity of infection (MOI) 30:1. A549 cells were incubated 3 h with pneumococcal  
470 strains and cells were washed three times with phosphate-buffered saline (PBS) and it was  
471 added fresh DMEM (with 5% FBS) containing 150 µg/ml gentamicin sulfate (US Biological

472 G2030). After a 30 min period, cells were washed three times with PBS. The eukaryotic cells  
 473 were trypsinized and the occurrence of apoptosis/necrosis caused by pneumococcal infection  
 474 was quantified by flow cytometry (Annexin V/propidium iodide labeling kit; Invitrogen) giving 5%  
 475 approximately for all time points analyzed. To determine intracellular survival, cells were lysed by  
 476 centrifugation for 5 min at 10,000 rpm and the bacterial pellet was resuspended in THYE  
 477 medium. The number of internalized bacteria at different time points was quantified after serial  
 478 dilutions and plating on BHI 5% sheep blood agar plates with incubation for 16 h at 37°C. The  
 479 time scale referred to the time after elimination of the extracellular bacteria by antibiotic  
 480 treatment. A 100% survival was defined after 30 min of antibiotic treatment (FigS1), and all the  
 481 samples were referred to this point to calculate the respective percentages.

482 For intracellular survival determinations in the viral-bacterial superinfection assays, approximately  
 483  $1.5 \times 10^5$  of eukaryotic cells (A549, MEF wt, MEF *atg5-KO*, and Hela cell lines) per well were  
 484 seeded in 6 well plates, cultured in DMEM (with 5% FBS) and incubated for 24 h. Posteriorly,  
 485 DMEM was removed from plates, cells were washed three times with PBS and cultured with  
 486 DMEM containing 1 µg/mL TPCK-treated trypsin for 1 h, and cells were infected with IAV at a  
 487 viral MOI of 10 at 37°C for 24 h. In parallel, the occurrence of apoptosis/necrosis produced by IAV  
 488 infection was determined by flow cytometry (Annexin V/propidium iodide labeling kit; Invitrogen)  
 489 and it was approximately 5%. To perform survival assays in cells previously infected with IAV and  
 490 treated with amantadine, we carried out the same protocol described above, but we added 50 µM  
 491 of amantadine (Sigma) at the same time that gentamycin. An analysis was carried out using a  
 492 confocal laser-scanning microscope (OlympusFV300) with a 100× oil immersion lens, as  
 493 described [15].

494

#### 495 **Susceptibility to acidic and oxidative stress**

496 To determine susceptibility to acidic pH, bacterial cells were grown in Brain Heart Infusion (BHI;  
 497 pH 7.2) at 37°C until  $OD_{600nm} \sim 0.3$ , centrifuged at 10,000 g for 5 min, resuspended in Todd  
 498 Hewitt-Yeast Extract (THYE; pH 4.8) and incubated for 1 h at 37°C. To measure susceptibility to  
 499 oxidative stress, bacterial cells were grown in BHI at 37°C until  $OD_{600nm} \sim 0.3$ , and 20 mM H<sub>2</sub>O<sub>2</sub>  
 500 was added to the cultures for 1 h at 37°C. To determine the survival percentage in these assays

(acidic and oxidative conditions), serial dilutions were made in THYE (pH 7.8) and plated onto 5% of sheep blood tryptic-soy agar (TSA) plates. After 24 h of incubation at 37°C, colonies were counted to determine the number of survivors. The percentages were calculated by dividing the number of survivors, at pH 4.8 or 20 mM H<sub>2</sub>O<sub>2</sub>, by the number of total cells at time zero before incubation at stressful conditions. Data were expressed as the mean percentage ± standard deviation (SD) of independent experiments performed in triplicate.

**In-gel tryptic digestion and amino acid sequencing of protein bands separated by SDS-PAGE** The protein band of 78 kDa, separated by SDS-PAGE and stained by Coomassie Blue, was cut and the gel slice was incubated in 100 mM ammonium bicarbonate (pH 8.3) containing 45 mM dithiothreitol at 60°C for 30 min. The sample was cooled at RT, and 100 mM iodoacetamide was added followed by incubation at RT in the dark for 30 min. The gel was then washed in 50% acetonitrile-100 mM ammonium bicarbonate with shaking for 1 h, cut in pieces, and transferred to a small plastic tube. Acetonitrile was added to shrink the gel slices and dried in a rotatory evaporator. Then, the gel pieces were treated with 100 mM ammonium bicarbonate (pH 8.3) containing trypsin at a 10:1 ratio (w/w, substrate: enzyme). The sample was incubated at 37 °C for 16 h, and digestion products were extracted twice from the gel with 0.1% trifluoroacetic acid for 20 min. Extractions were loaded into a C18 high-pressure liquid chromatography column (220 × 1 mm), and peptides were eluted with 80% acetonitrile-0.08% trifluoroacetic acid. Selected peaks were applied to a 477A protein-peptide sequencer equipped with a 140 HPLC (Applied Biosystems) and subjected to Edman degradation sequence analysis at the Laboratorio Nacional de Investigacion y Servicios en Péptidos y Proteínas facility (CONICET)[75].

## Mass Spectrometry Analysis

Protein digestion and Mass Spectrometry analysis were performed at the Proteomics Core Facility CEQUIBIEM, at the University of Buenos Aires/ CONICET (National Research Council) as follows. Protein samples were reduced with dithiothreitol (DTT) in 50 mM of ammonium bicarbonate at a final concentration of 10 mM (45 min, 56°C) and alkylated with iodoacetamide in the same solvent at a final concentration of 30 mM (40 min, RT, in darkness). Proteins were digested with trypsin (Promega V5111). After that, the peptides were purified and desalted with

529 ZipTip C18 columns (Millipore). The digests were analyzed by nano-LC-MS/MS in a Q-Exactive  
 530 Mass Spectrometer (Thermo Scientific) coupled to a nano-HPLC EASY-nLC 1000 (Thermo  
 531 Scientific). For the LC-MS/MS analysis, approximately 1 µg of peptides were loaded onto the  
 532 column and eluted for 120 minutes using a reverse phase column (C18, 2 µm, 100A, 50 µm x  
 533 150 mm) Easy-Spray Column PepMap RSLC (P/N ES801) suitable for separating protein  
 534 complexes with a high degree of resolution. The flow rate used for the nano-column was 300 nL  
 535 min<sup>-1</sup> and the solvent range from 7% B (5 min) to 35% (120 min). Solvent A was 0.1% formic  
 536 acid in water whereas B was 0.1% formic acid in acetonitrile. The injection volume was 2 µL. The  
 537 MS equipment has a high collision dissociation cell (HCD) for fragmentation and a Q-Exactive  
 538 Orbitrap analyzer (Thermo Scientific). A voltage of 3.5 kV was used for Electro Spray Ionization  
 539 (Easy-Spray; Thermo Scientific,). XCalibur 3.0.63 (Thermo Scientific) software was used for data  
 540 acquisition and equipment configuration that allows peptide identification at the same time of their  
 541 chromatographic separation. Full-scan mass spectra were acquired in the Orbitrap analyzer. The  
 542 scanned mass range was 400-1800 m/z, at a resolution of 70000 at 400 m/z and the twelve most  
 543 intense ions in each cycle were sequentially isolated, fragmented by HCD and measured in the  
 544 Orbitrap analyzer. Peptides with a charge of +1 or with unassigned charge state were excluded  
 545 from fragmentation for MS2.

#### 546 **Analysis of MS data**

547 Q-Exactive raw data was processed using Proteome Discoverer software (version 2.1.1.21  
 548 Thermo Scientific) and searched against *Streptococcus pneumoniae* (strain ATCC BAA-255 R6)  
 549 UP000000586 protein sequences database with trypsin specificity and a maximum of one missed  
 550 cleavage per peptide. Proteome Discoverer searches were performed with a precursor mass  
 551 tolerance of 10 ppm and a product ion tolerance to 0.05 Da. Static modifications were set to  
 552 carbamidomethylation of Cys, and dynamic modifications were set to oxidation of Met and N-  
 553 terminal acetylation. Protein hits were filtered for high confidence peptide matches with a  
 554 maximum protein and peptide false discovery rate of 1% calculated by employing a reverse  
 555 database strategy.

556 Proteome Discoverer calculates an area for each protein in each condition. To do this it uses the  
 557 area under the curve of the 3 most intense peptides for a protein. Areas were calculated for each  
 558 of the three triplicates and normalized. The data obtained for the area for each protein were  
 559 processed with the Perseus program (Max Planck Institute of Biochemistry, 1.5.5.3 version,  
 560 available for free) [76] that allows a deeper statistical analysis. Different scatter plots were done  
 561 according to the compared samples. For each couple of samples, we plotted log  $p$ -value (-log  
 562 Student T-test  $p$ -value A\_B) on the y-axis versus Student T-test Difference A\_B in the x-axis.  
 563 Proteins that appear in the volcano plot with a fold change greater than 2 (less than -1 or greater  
 564 than 1 on the x-axis of the graph) and a  $p$ -value < 0.05 (above 1.3 on the y-axis of the graph)  
 565 were considered as differentially expressed.

#### 566 **RNAseq analysis**

567 Cells were initially grown in THYE medium at pH 7.8 until OD<sub>600nm</sub> ~0.3 (log phase), centrifuged at  
 568 14,000 g for 10 min at 4°C, resuspended in the same volume in ABM at pH 5.9 [23] and  
 569 incubated a 37°C for 1h. Then, cells were centrifuged at 14,000 x g for 10 min at 4°C,  
 570 resuspended in a 1/10 vol of lysis buffer (DOC 1% in 0.9% Na Cl) and incubated 3 min a 37°C  
 571 until complete lysis. Total RNA from three biological replicates for *wt* and the  $\Delta visR$  mutant were  
 572 purified by TRIzol reagent according to the manufacturer's instructions (Fisher Scientific). The  
 573 RNA for RNAseq assays was obtained as described [16]. Data analysis was performed as  
 574 reported [62].

#### 575 **Differential gene expression.**

576 The aligned reads were assembled by Cufflinks (version-2.2.1), and then the differentially  
 577 expressed genes were detected and quantified by Cuffdiff, which is included in the Cufflinks  
 578 package, using a rigorous sophisticated statistical analysis. The expression of the genes was  
 579 calculated in terms of FPKM (fragment per kilobase per million mapped reads). Differential gene  
 580 expression analysis was carried out between *wt* and the  $\Delta visR$  samples.

#### 581 **Protein analysis by western blots**

582 The A549 cells were lysed and protease inhibitor cocktail added to obtain the whole protein to be  
 583 quantified. The lysates with protein loading buffer were boiled for 5 min. The supernatants were

collected and 40 µg of each sample were loaded onto 15% SDS-PAGE gels and electrophoresed for protein resolution at RT using Tris-Glycine-SDS running buffer at a constant electric field of 100 V cm<sup>-1</sup>. Posteriorly, proteins were electroblotted onto PVDF membranes, which were blocked for 2 h at room temperature and incubated overnight at 4°C with primary antibodies diluted at 1:1,000 in PBS with 5% bovine serum albumin buffer. After washing 3 times with Tris-buffered saline (TBS) with 0.5% (v/v) Tween, the membranes were incubated for 2 h at room temperature with Alexa-conjugated secondary antibody (1:1,000 dilution) to detect LC3-II and p62. The membranes were imaged under fluorescence mode in an Odyssey CLx Imaging System (LI-COR), and bands were quantified with Image Studio software (LI-COR). Rabbit monoclonal antibody against LC3A/B (D3U4C) XP(R) (12741P) was obtained from Cell Signaling Technology. Rapamycin (R8781; Rapa, mTOR inhibitor), Bafilomycin A 1 from *Streptomyces* (B1793) and Mouse monoclonal anti-beta-actin antibody (A2228) were obtained from Sigma Life Science. Mouse monoclonal antibody against Influenza A M2 protein [14C2] (ab5416) was obtained from Abcam. Recombinant Rabbit monoclonal antibody against SQSTM1/p62 (701510) was purchased to Invitrogen.

#### qRT-PCR

cDNA was synthesized from 2 µg RNA using the ProtoScript II First Strand cDNA Synthesis Kit (NEB) following the manufacturer's protocol, and cDNA was cleaned using the QIAquick PCR Purification Kit (Qiagen). Genes were amplified using the oligonucleotides listed in the Table S4 and PowerUp SYBR Green Master Mix (Applied Biosystem) following the manufacturer's protocol. Expression was determined relative to AU0158 normalized by *gyrA* (*spr1099*) expression using the  $\Delta\Delta C_t$  method [77]. The *gyrA* had a similar expression by RNA-Seq for *wt* and the  $\Delta visR$  mutant, and this had been used to normalize the expression in *S. pneumoniae* in other studies [78].

#### ROS detection

To assess ROS production, we used 2',7'-Dichlorodihydrofluorescein diacetate dye (H<sub>2</sub>DCF-DA; Molecular Probes) following the manufacturer's instructions. Briefly, we infected A549 cells with IAV at MOI 10 as it was indicated above, 24 h post-infection the cells were trypsinized and washed twice with PBS, resuspended with PBS containing H<sub>2</sub>DCF-DA (10 µM) and incubated for



613 30 min at 37°C. Then, cells were washed and resuspended with PBS and we measured the  
614 intensity of fluorescence of the DCF by cytometry.

## 615 Accession numbers

616 The RNA-Seq data generated from this study are deposited at the NCBI SRA under the  
617 accession numbers SAMN08473835 (*wt* strain) and SAMN08473837 ( $\Delta visR$  strain). This data  
618 corresponds to the Bioproject PRJNA433281, and the SRA IDs are SRR6679010 and  
619 SRR6679012.

## 620 Acknowledgments

621 We thank Gabriela Furlan, Laura Gatica, Paula Abadie, Pilar Crespo, Alejandra Romero (CIBICI-  
622 CONICET) and Carlos Mas (CIQUIBIC-CONICET) for their skillful technical assistance. We thank  
623 Dr. Noboru Mizushima (Department of Biochemistry and Molecular Biology, The University of  
624 Tokyo, Japan) for the kind gift of MEF *atg5-KO* and MEF *wt*. We thank Alex Saka for technical  
625 discussions.

## 626 Figure legends

627 **Fig 1.** Enhancement of pneumococcal intracellular survival by Influenza A infection is mediated  
628 by the VisRH two-component system.

629 **Fig 2.** VisRH controls the acidic and oxidative stress response of *S. pneumoniae* in both culture  
630 media and pneumocytes.

631 **Fig 3.** VisR controls gene expression of the stress response in *S. pneumoniae*.

632 **Fig 4.** Comparative proteomic analysis of differentially expressed proteins in the  $\Delta visR$  and *wt*  
633 strains.

634 **Fig 5.** ClpL and PsaB are involved in the pneumococcal stress response needed for the viral-  
635 bacterial synergism.

636 **Fig 6.** The viral-bacterial synergism is dependent on autophagic-proficient cells.

637 **Fig 7.** Proposed model for the synergistic mechanism that exists between influenza A and *S.*  
638 *pneumoniae* in pneumocytes.

639

## 640 **Supporting Information**

641 **S1 fig.** Determination of apoptosis and necrosis levels in A549 cells infected with IAV and/or *S.*  
642 *pneumoniae*.

643 **S2 fig.** Identification of histidine kinase (hk) mutants of *S. pneumoniae* displaying normal  
644 intracellular survival in pneumocytes.

645 **S3 fig.** Confirmation of the IAV-induced ROS production in A549 cells.

646 **S4 fig.** VisR is a global regulator that controls gene expression during the stress response.

647 **S5 fig.** Comparative proteomic analysis between the *wt* and the  $\Delta visR$  strains.

648 **S6 fig.** Identification of the pneumococcal 78-kDa ClpL chaperone expressed under acidic  
649 conditions.

650 **S7 fig.** IAV and *S. pneumoniae* infection and superinfection induce autophagy in A549 cells.

651 **S1 table.** Plasmids and strains used in this work

652 **S2 table.** List of VisR-regulated genes as determined by RNAseq analysis

653 **S3 table.** List of differentially expressed proteins in the  $\Delta visR$  mutant compared with *wt*

654 **S4 table.** Primers used in this work

655

## 656 **References**

- 657 1. Klein EY, Monteforte B, Gupta A, Jiang W, May L, et al. (2016) The frequency of influenza and  
658 bacterial coinfection: a systematic review and meta-analysis. *Influenza Other Respir Viruses* 10:  
659 394-403.
- 660 2. Smith AM, McCullers JA (2014) Secondary bacterial infections in influenza virus infection  
661 pathogenesis. *Curr Top Microbiol Immunol* 385: 327-356.
- 662 3. Joseph C, Togawa Y, Shindo N (2013) Bacterial and viral infections associated with influenza.  
663 *Influenza Other Respir Viruses* 7 Suppl 2: 105-113.
- 664 4. Brundage JF, Shanks GD (2008) Deaths from bacterial pneumonia during 1918-19 influenza  
665 pandemic. *Emerg Infect Dis* 14: 1193-1199.
- 666 5. Morens DM, Taubenberger JK, Fauci AS (2008) Predominant role of bacterial pneumonia as a  
667 cause of death in pandemic influenza: implications for pandemic influenza preparedness. *J Infect*  
668 *Dis* 198: 962-970.
- 669 6. Kim L, McGee L, Tomczyk S, Beall B (2016) Biological and Epidemiological Features of  
670 Antibiotic-Resistant *Streptococcus pneumoniae* in Pre- and Post-Conjugate Vaccine Eras: a  
671 United States Perspective. *Clin Microbiol Rev* 29: 525-552.
- 672 7. Dawood FS, Iuliano AD, Reed C, Meltzer MI, Shay DK, et al. (2012) Estimated global mortality  
673 associated with the first 12 months of 2009 pandemic influenza A H1N1 virus circulation: a  
674 modelling study. *Lancet Infect Dis* 12: 687-695.
- 675 8. Chertow DS, Memoli MJ (2013) Bacterial coinfection in influenza: a grand rounds review.  
676 *JAMA* 309: 275-282.
- 677 9. McCullers JA (2006) Insights into the interaction between influenza virus and pneumococcus.  
678 *Clin Microbiol Rev* 19: 571-582.

- 679 10. McCullers JA (2014) The co-pathogenesis of influenza viruses with bacteria in the lung. *Nat*  
680 *Rev Microbiol* 12: 252-262.
- 681 11. McNamee LA, Harmsen AG (2006) Both influenza-induced neutrophil dysfunction and  
682 neutrophil-independent mechanisms contribute to increased susceptibility to a secondary  
683 *Streptococcus pneumoniae* infection. *Infect Immun* 74: 6707-6721.
- 684 12. Abramson JS, Giebink GS, Mills EL, Quie PG (1981) Polymorphonuclear leukocyte  
685 dysfunction during influenza virus infection in chinchillas. *J Infect Dis* 143: 836-845.
- 686 13. Ercoli G, Fernandes VE, Chung WY, Wanford JJ, Thomson S, et al. (2018) Intracellular  
687 replication of *Streptococcus pneumoniae* inside splenic macrophages serves as a reservoir for  
688 septicaemia. *Nat Microbiol* 3: 600-610.
- 689 14. Ogawa M, Matsuda R, Takada N, Tomokiyo M, Yamamoto S, et al. (2018) Molecular  
690 mechanisms of *Streptococcus pneumoniae*-targeted autophagy via pneumolysin, Golgi-resident  
691 Rab41, and Nedd4-1-mediated K63-linked ubiquitination. *Cell Microbiol* 20: e12846.
- 692 15. Cortes PR, Pinas GE, Cian MB, Yandar N, Echenique J (2015) Stress-triggered signaling  
693 affecting survival or suicide of *Streptococcus pneumoniae*. *Int J Med Microbiol* 305: 157-169.
- 694 16. Pinas GE, Reinoso-Vizcaino NM, Yandar Barahona NY, Cortes PR, Duran R, et al. (2018)  
695 Crosstalk between the serine/threonine kinase StkP and the response regulator ComE controls  
696 the stress response and intracellular survival of *Streptococcus pneumoniae*. *PLoS Pathog* 14:  
697 e1007118.
- 698 17. Kilbourne ED (1969) Future influenza vaccines and the use of genetic recombinants. *Bull*  
699 *World Health Organ* 41: 643-645.
- 700 18. Hava DL, Camilli A (2002) Large-scale identification of serotype 4 *Streptococcus pneumoniae*  
701 virulence factors. *Mol Microbiol* 45: 1389-1406.
- 702 19. Throup JP, Koretke KK, Bryant AP, Ingraham KA, Chalker AF, et al. (2000) A genomic  
703 analysis of two-component signal transduction in *Streptococcus pneumoniae*. *Mol Microbiol* 35:  
704 566-576.
- 705 20. Trihn M, Ge X, Dobson A, Kitten T, Munro CL, et al. (2013) Two-component system response  
706 regulators involved in virulence of *Streptococcus pneumoniae* TIGR4 in infective endocarditis.  
707 *PLoS One* 8: e54320.
- 708 21. Sung CK, Li H, Claverys JP, Morrison DA (2001) An *rpsL* cassette, janus, for gene  
709 replacement through negative selection in *Streptococcus pneumoniae*. *Appl Environ Microbiol* 67:  
710 5190-5196.
- 711 22. Jacob-Dubuisson F, Mechaly A, Betton JM, Antoine R (2018) Structural insights into the  
712 signalling mechanisms of two-component systems. *Nat Rev Microbiol* 16: 585-593.
- 713 23. Albarracin Orio AG, Cortes PR, Tregnaghi M, Pinas GE, Argentinean Network  
714 *Pneumococcus Study G*, et al. (2008) A new serotype 14 variant of the pneumococcal Spain9V-3  
715 international clone detected in the central region of Argentina. *J Med Microbiol* 57: 992-999.
- 716 24. Gagliardi S, Rees M, Farina C (1999) Chemistry and structure activity relationships of  
717 bafilomycin A1, a potent and selective inhibitor of the vacuolar H<sup>+</sup>-ATPase. *Curr Med Chem* 6:  
718 1197-1212.
- 719 25. Surve MV, Bhutda S, Datey A, Anil A, Rawat S, et al. (2018) Heterogeneity in pneumolysin  
720 expression governs the fate of *Streptococcus pneumoniae* during blood-brain barrier trafficking.  
721 *PLoS Pathog* 14: e1007168.
- 722 26. Gannage M, Dormann D, Albrecht R, Dengjel J, Torossi T, et al. (2009) Matrix protein 2 of  
723 influenza A virus blocks autophagosome fusion with lysosomes. *Cell Host Microbe* 6: 367-380.
- 724 27. McCluskey J, Hinds J, Husain S, Witney A, Mitchell TJ (2004) A two-component system that  
725 controls the expression of pneumococcal surface antigen A (PsaA) and regulates virulence and  
726 resistance to oxidative stress in *Streptococcus pneumoniae*. *Mol Microbiol* 51: 1661-1675.
- 727 28. Yesilkaya H, Kadioglu A, Gingles N, Alexander JE, Mitchell TJ, et al. (2000) Role of  
728 manganese-containing superoxide dismutase in oxidative stress and virulence of *Streptococcus*  
729 *pneumoniae*. *Infect Immun* 68: 2819-2826.
- 730 29. McAllister LJ, Tseng HJ, Ogunniyi AD, Jennings MP, McEwan AG, et al. (2004) Molecular  
731 analysis of the psa permease complex of *Streptococcus pneumoniae*. *Mol Microbiol* 53: 889-901.
- 732 30. Khomich OA, Kochetkov SN, Bartosch B, Ivanov AV (2018) Redox Biology of Respiratory  
733 Viral Infections. *Viruses* 10.
- 734 31. Komaravelli N, Casola A (2014) Respiratory Viral Infections and Subversion of Cellular  
735 Antioxidant Defenses. *J Pharmacogenomics Pharmacoproteomics* 5.

- 736 32. Paul M, Thushara RM, Jagadish S, Zakai UI, West R, et al. (2017) Novel sila-amide  
737 derivatives of N-acetylcysteine protects platelets from oxidative stress-induced apoptosis. J  
738 Thromb Thrombolysis 43: 209-216.
- 739 33. Park SS, Kwon HY, Tran TD, Choi MH, Jung SH, et al. (2015) ClpL is a chaperone without  
740 auxiliary factors. FEBS J 282: 1352-1367.
- 741 34. Choi IH, Shim JH, Kim SW, Kim SN, Pyo SN, et al. (1999) Limited stress response in  
742 *Streptococcus pneumoniae*. Microbiol Immunol 43: 807-812.
- 743 35. Filipe SR, Tomasz A (2000) Inhibition of the expression of penicillin resistance in  
744 *Streptococcus pneumoniae* by inactivation of cell wall mucopeptide branching genes. Proc Natl  
745 Acad Sci U S A 97: 4891-4896.
- 746 36. Jiang YL, Jin H, Yang HB, Zhao RL, Wang S, et al. (2017) Defining the enzymatic pathway  
747 for polymorphic O-glycosylation of the pneumococcal serine-rich repeat protein PsrP. J Biol  
748 Chem 292: 6213-6224.
- 749 37. Horsburgh MJ, Foster TJ, Barth PT, Coggins JR (1996) Chorismate synthase from  
750 *Staphylococcus aureus*. Microbiology 142 ( Pt 10): 2943-2950.
- 751 38. Hua CZ, Howard A, Malley R, Lu YJ (2014) Effect of nonheme iron-containing ferritin Dpr in  
752 the stress response and virulence of pneumococci. Infect Immun 82: 3939-3947.
- 753 39. Jacob C, Kriznik A, Boschi-Muller S, Branlant G (2011) Thioredoxin 2 from *Escherichia coli* is  
754 not involved in vivo in the recycling process of methionine sulfoxide reductase activities. FEBS  
755 Lett 585: 1905-1909.
- 756 40. Kim SN, Kim SW, Pyo SN, Rhee DK (2001) Molecular cloning and characterization of groESL  
757 operon in *Streptococcus pneumoniae*. Mol Cells 11: 360-368.
- 758 41. Dreux N, del Mar Cendra M, Massier S, Darfeuille-Michaud A, Barnich N, et al. (2015)  
759 Ribonucleotide reductase NrdR as a novel regulator for motility and chemotaxis during adherent-  
760 invasive *Escherichia coli* infection. Infect Immun 83: 1305-1317.
- 761 42. Law AH, Lee DC, Leon TY, Lau AS (2014) Role for autophagy in cellular response to  
762 influenza virus infection. Hong Kong Med J 20 Suppl 6: 20-24.
- 763 43. Li P, Shi J, He Q, Hu Q, Wang YY, et al. (2015) *Streptococcus pneumoniae* induces  
764 autophagy through the inhibition of the PI3K-I/Akt/mTOR pathway and ROS hypergeneration in  
765 A549 cells. PLoS One 10: e0122753.
- 766 44. Yamamoto A, Tagawa Y, Yoshimori T, Moriyama Y, Masaki R, et al. (1998) Bafilomycin A1  
767 prevents maturation of autophagic vacuoles by inhibiting fusion between autophagosomes and  
768 lysosomes in rat hepatoma cell line, H-4-II-E cells. Cell Struct Funct 23: 33-42.
- 769 45. Kepp O, Senovilla L, Vitale I, Vacchelli E, Adjemian S, et al. (2014) Consensus guidelines for  
770 the detection of immunogenic cell death. Oncoimmunology 3: e955691.
- 771 46. Zhou Z, Jiang X, Liu D, Fan Z, Hu X, et al. (2009) Autophagy is involved in influenza A virus  
772 replication. Autophagy 5: 321-328.
- 773 47. Tanida I, Ueno T, Uchiyama Y (2017) Use of pHluorin-mKate2-human LC3 to Monitor  
774 Autophagic Responses. Methods Enzymol 587: 87-96.
- 775 48. Kuma A, Hatano M, Matsui M, Yamamoto A, Nakaya H, et al. (2004) The role of autophagy  
776 during the early neonatal starvation period. Nature 432: 1032-1036.
- 777 49. Pasqua M, Grossi M, Scinicariello S, Aussel L, Barras F, et al. (2019) The MFS efflux pump  
778 EmrKY contributes to the survival of *Shigella* within macrophages. Sci Rep 9: 2906.
- 779 50. Pardo-Este C, Hidalgo AA, Aguirre C, Inostroza A, Briones AC, et al. (2019) Correction: The  
780 ArcAB two-component regulatory system promotes resistance to reactive oxygen species and  
781 systemic infection by *Salmonella Typhimurium*. PLoS One 14: e0214634.
- 782 51. Bourret TJ, Liu L, Shaw JA, Husain M, Vazquez-Torres A (2017) Magnesium homeostasis  
783 protects *Salmonella* against nitrooxidative stress. Sci Rep 7: 15083.
- 784 52. Kenney LJ (2018) The role of acid stress in *Salmonella* pathogenesis. Curr Opin Microbiol 47:  
785 45-51.
- 786 53. James KL, Mogen AB, Brandwein JN, Orsini SS, Ridder MJ, et al. (2019) Interplay of Nitric  
787 Oxide Synthase (NOS) and SrrAB in Modulation of *Staphylococcus aureus* Metabolism and  
788 Virulence. Infect Immun 87.
- 789 54. Flannagan RS, Kuiack RC, McGavin MJ, Heinrichs DE (2018) *Staphylococcus aureus* Uses  
790 the GraXRS Regulatory System To Sense and Adapt to the Acidified Phagolysosome in  
791 Macrophages. MBio 9.

55. Zhuge X, Sun Y, Xue F, Tang F, Ren J, et al. (2018) A Novel PhoP/PhoQ Regulation Pathway Modulates the Survival of Extraintestinal Pathogenic *Escherichia coli* in Macrophages. *Front Immunol* 9: 788.
56. Altamirano-Silva P, Meza-Torres J, Castillo-Zeledon A, Ruiz-Villalobos N, Zuniga-Pereira AM, et al. (2018) *Brucella abortus* Senses the Intracellular Environment through the BvrR/BvrS Two-Component System, Which Allows *B. abortus* To Adapt to Its Replicative Niche. *Infect Immun* 86.
57. Mishra AK, Yabaji SM, Dubey RK, Dhamija E, Srivastava KK (2017) Dual phosphorylation in response regulator protein PrrA is crucial for intracellular survival of mycobacteria consequent upon transcriptional activation. *Biochem J* 474: 4119-4136.
58. Paterson GK, Blue CE, Mitchell TJ (2006) Role of two-component systems in the virulence of *Streptococcus pneumoniae*. *J Med Microbiol* 55: 355-363.
59. Gomez-Mejia A, Gamez G, Hammerschmidt S (2018) *Streptococcus pneumoniae* two-component regulatory systems: The interplay of the pneumococcus with its environment. *Int J Med Microbiol* 308: 722-737.
60. Kwon HY, Kim SW, Choi MH, Ogunniyi AD, Paton JC, et al. (2003) Effect of heat shock and mutations in ClpL and ClpP on virulence gene expression in *Streptococcus pneumoniae*. *Infect Immun* 71: 3757-3765.
61. Len AC, Harty DW, Jacques NA (2004) Proteome analysis of *Streptococcus mutans* metabolic phenotype during acid tolerance. *Microbiology* 150: 1353-1366.
62. Tao L, Biswas I (2013) ClpL is required for folding of CtsR in *Streptococcus mutans*. *J Bacteriol* 195: 576-584.
63. Novak R, Braun JS, Charpentier E, Tuomanen E (1998) Penicillin tolerance genes of *Streptococcus pneumoniae*: the ABC-type manganese permease complex Psa. *Mol Microbiol* 29: 1285-1296.
64. Marra A, Lawson S, Asundi JS, Brigham D, Hromockyj AE (2002) In vivo characterization of the psa genes from *Streptococcus pneumoniae* in multiple models of infection. *Microbiology* 148: 1483-1491.
65. Johnston JW, Myers LE, Ochs MM, Benjamin WH, Jr., Briles DE, et al. (2004) Lipoprotein PsaA in virulence of *Streptococcus pneumoniae*: surface accessibility and role in protection from superoxide. *Infect Immun* 72: 5858-5867.
66. Kajfasz JK, Rivera-Ramos I, Abranches J, Martinez AR, Rosalen PL, et al. (2010) Two Spx proteins modulate stress tolerance, survival, and virulence in *Streptococcus mutans*. *J Bacteriol* 192: 2546-2556.
67. Chastanet A, Prudhomme M, Claverys JP, Msadek T (2001) Regulation of *Streptococcus pneumoniae* clp genes and their role in competence development and stress survival. *J Bacteriol* 183: 7295-7307.
68. Kloosterman TG, Witwicki RM, van der Kooi-Pol MM, Bijlsma JJ, Kuipers OP (2008) Opposite effects of Mn<sup>2+</sup> and Zn<sup>2+</sup> on PsaR-mediated expression of the virulence genes pcpA, prtA, and psaBCA of *Streptococcus pneumoniae*. *J Bacteriol* 190: 5382-5393.
69. Pyo CW, Shin N, Jung KI, Choi JH, Choi SY (2014) Alteration of copper-zinc superoxide dismutase 1 expression by influenza A virus is correlated with virus replication. *Biochem Biophys Res Commun* 450: 711-716.
70. Gennaris A, Collet JF (2013) The 'captain of the men of death', *Streptococcus pneumoniae*, fights oxidative stress outside the 'city wall'. *EMBO Mol Med* 5: 1798-1800.
71. Eijkelkamp BA, Morey JR, Ween MP, Ong CL, McEwan AG, et al. (2014) Extracellular zinc competitively inhibits manganese uptake and compromises oxidative stress management in *Streptococcus pneumoniae*. *PLoS One* 9: e89427.
72. Turner AG, Ong CY, Walker MJ, Djoko KY, McEwan AG (2017) Transition Metal Homeostasis in *Streptococcus pyogenes* and *Streptococcus pneumoniae*. *Adv Microb Physiol* 70: 123-191.
73. Albarracin Orio AG, Pinas GE, Cortes PR, Cian MB, Echenique J (2011) Compensatory evolution of pbp mutations restores the fitness cost imposed by beta-lactam resistance in *Streptococcus pneumoniae*. *PLoS Pathog* 7: e1002000.
74. Chockalingam AK, Hickman D, Pena L, Ye J, Ferrero A, et al. (2012) Deletions in the neuraminidase stalk region of H2N2 and H9N2 avian influenza virus subtypes do not affect postinfluenza secondary bacterial pneumonia. *J Virol* 86: 3564-3573.



848 75. Morelli L, Llovera R, Gonzalez SA, Affranchino JL, Prelli F, et al. (2003) Differential  
849 degradation of amyloid beta genetic variants associated with hereditary dementia or stroke by  
850 insulin-degrading enzyme. J Biol Chem 278: 23221-23226.  
851 76. Tyanova S, Temu T, Sinitsyn P, Carlson A, Hein MY, et al. (2016) The Perseus computational  
852 platform for comprehensive analysis of (prote)omics data. Nat Methods 13: 731-740.  
853 77. Livak KJ, Schmittgen TD (2001) Analysis of relative gene expression data using real-time  
854 quantitative PCR and the 2(-Delta Delta C(T)) Method. Methods 25: 402-408.  
855 78. Mann B, van Opijnen T, Wang J, Obert C, Wang YD, et al. (2012) Control of virulence by  
856 small RNAs in *Streptococcus pneumoniae*. PLoS Pathog 8: e1002788.

857

## 858 **Figure legends**

859 **Fig 1. Enhancement of pneumococcal intracellular survival by Influenza A infection is**  
860 **mediated by the VisRH two-component system.** (A) The IAV-*S. pneumoniae* synergism is  
861 independent of the cell line. The A549, MEF and HeLa cells were treated for 24 h with a viral  
862 MOI of 10 and posteriorly infected with the pneumococcal wt strain using a bacterial MOI of 30.  
863 Bacterial survival progression was monitored using a typical protection assay. Survival  
864 percentages were calculated by considering the total amount of internalized bacteria after 30 min  
865 of extracellular antibiotic treatment as representing 100% for each strain. After antibiotic  
866 treatment, samples were taken at 4 hours, and pneumocytes were lysed to release pneumococci.  
867 Samples were diluted in BHI, spread on BHI-blood-agar plates and incubated at 37°C for 16 h.  
868 IAV-infected cells are indicated with green bars, IAV-infected cells with amantadine are indicated  
869 with blue bars, and non-virus infected cells with white bars. (B) The synergism between IAV and  
870 *S. pneumoniae* is mediated by the VisRH two-component system. A549 cells were previously  
871 infected with a viral MOI of 10 for 24 h, and then coinfecting by the wt,  $\Delta visH$ ,  $hk01::ery$  (or  
872  $visH::ery$ ) and  $\Delta visR$  strains, and the revertant of the  $\Delta visR$  mutant ( $wr visR^+$ ). Intracellular  
873 survival rates were determined as described in panel A. IAV-infected cells are indicated with  
874 green bars and non-virus infected cells with white bars. For all panels, data are representative of  
875 at least three independent experiments and statistically significant differences are indicated as  
876  $p < 0.05$  (\*),  $p < 0.01$  (\*\*) or  $p < 0.001$  (\*\*\*).

877

878 **Fig 2. VisRH controls the acidic and oxidative stress response of *S. pneumoniae* in both**  
879 **culture media and pneumocytes.** (A) The  $\Delta visR$  mutant is susceptible to acidified media. The  
880  $\Delta visR$ ,  $wr visR^+$ ,  $atpC^{A49T}$  and wt cells were grown in BHI until an OD<sub>620nm</sub> 0.3 and then incubated

881 in ABM at pH 4.8 for 1 h. Viable cells were assessed by spreading dilutions in BHI-blood-agar  
 882 plates and incubating these at 37°C for 16 h. (B) Bafilomycin-A1-induced lysosomal neutralization  
 883 does not affect the impaired intracellular survival of the  $\Delta visR$  mutant in IAV-infected cells. A549  
 884 cells were infected with the  $\Delta visR$ ,  $atpC^{A49T}$  and  $wt$  cells and intracellular survival was determined  
 885 as described in the Fig 1. White bars correspond to non-virus infected cells, green bars to IAV-  
 886 infected cells and blue bars to Bafilomycin-A1-treated cells. (C) The  $\Delta visR$  mutant is sensitive to  
 887 H<sub>2</sub>O<sub>2</sub>. The  $\Delta visR$ ,  $wr visR^+$ ,  $\Delta sodA$  and  $wt$  cells were grown in BHI and then exposed at BHI  
 888 medium containing 20 mM H<sub>2</sub>O<sub>2</sub> for 2 h. After that, viable cells were determined by spreading  
 889 dilutions in BHI-blood-agar plates and incubating these at 37°C for 16 h. (D) Inhibition of ROS  
 890 production does not affect the intracellular survival of the  $\Delta visR$  mutant. A549 cells were infected  
 891 with the  $\Delta visR$ ,  $\Delta sodA$  and  $wt$  cells and intracellular survival was determined as described in the  
 892 Fig 1 legend. White bars correspond to non-virus infected cells, green bars to IAV-infected cells  
 893 and blue bars to NAC-treated cells. For all panels, data are representative of at least three  
 894 independent experiments and statistically significant differences are indicated as  $p < 0.05$  (\*) or  
 895  $p < 0.001$  (\*\*).

896

897 **Fig 3. VisR controls gene expression of the stress response in *S. pneumoniae*.** (A) RNA-  
 898 seq heatmap shows gene expression of the comparison between the  $\Delta visR$  and  $wt$  strains  
 899 incubated in ABM with relative gene expression in log<sub>2</sub> fold change demonstrating increased  
 900 expression in green and decreased expression in red. Gene expressions higher than 2 fold and p  
 901 values <0.05 were considered significant. (B) Categories of VisR-regulated genes obtained from  
 902 an RNAseq analysis. An RNAseq generated distribution in functional categories of genes that are  
 903 regulated in the  $\Delta visR$  mutant relative to strain  $wt$ . (C) Putative VisR-regulated genes expressed  
 904 in the  $\Delta visR$  mutant relative to strain  $wt$ . Gene expression determined by RNAseq was confirmed  
 905 by qPCR. The  $\Delta visR$  and  $wt$  strains were grown in BHI to the mid-exponential phase in triplicate  
 906 and then incubated in ABM for 1h. The fold change in gene expression was measured by RT-  
 907 qPCR and calculated using the  $2^{-\Delta\Delta CT}$  method. The *gyrA* gene was used as internal control.

908



909 **Fig 4. Comparative proteomic analysis of differentially expressed proteins in the  $\Delta visR$**   
 910 **and *wt* strains.** (A) Heat map of proteins expressed in the  $\Delta visR$  mutant and referred to *wt*.  
 911 Proteins with a fold change greater than 2 (less than -1 or greater than 1 on the x-axis of the  
 912 graph) and a *p*-value < 0.05 were considered as differentially expressed. Higher expression in the  
 913 *wt* is displayed in shades of green, and higher expression in the  $\Delta visR$  mutant (compared to *wt*) is  
 914 showed in shades of blue. (B) Comparison between  $\log_2$  folds change ( $\Delta visR/wt$ ) obtained by  
 915 both RNAseq (green bars) and proteomic (blue bars) analysis.

916

917 **Fig 5. ClpL and PsaB are involved in the pneumococcal stress response needed for the**  
 918 **viral-bacterial synergism.** (A) Transcription levels of the *clpL* gene increased in cells exposed to  
 919 acidic pH. The *wt* cells were grown in BHI/pH 7.8 to the mid-exponential phase and resuspended  
 920 in ABM/pH 5.9, and total RNA was extracted at 1 h. The fold change in gene expression was  
 921 measured by quantitative real-time PCR and calculated using the  $2^{-\Delta\Delta CT}$  method. The *gyrA*  
 922 gene was used as the internal control. Error bars indicate the standard deviation of the mean.  
 923 INSTAT software was used to perform Dunnet's statistical comparison test for each strain.  
 924 References: \*\**p* < 0.01; \*\*\**p* < 0.001. (B) The  $\Delta clpL$  and  $\Delta psaB$  mutants are susceptible to acidified  
 925 media. The  $\Delta clpL$ ,  $\Delta psaB$  and *wt* cells were grown in BHI until an  $OD_{620nm}$  0.3 and then incubated  
 926 in ABM medium at pH 4.8 for 1 h. After that, viable cells were assessed as described in the Fig 2  
 927 legend. (C) The intracellular survival of the  $\Delta clpL$  and  $\Delta psaB$  mutant is decreased compared with  
 928 *wt*. A549 cells were infected with the  $\Delta clpL$ ,  $\Delta psaB$  and *wt* cells and intracellular survival was  
 929 determined as described in the Fig 1 legend. White bars correspond to non-virus infected cells,  
 930 green bars to IAV-infected cells and blue bars to Bafilomycin-A1-treated cells. (D) The  $\Delta clpL$  and  
 931  $\Delta psaB$  mutants are susceptible to  $H_2O_2$ . The  $\Delta visR$ ,  $\Delta sodA$  and *wt* cells were grown in BHI until  
 932 an  $OD_{620nm}$  0.3 and then exposed at BHI medium containing 20 mM  $H_2O_2$  for 2 h. After that,  
 933 viable cells were determined as described in the Fig 2 legend. (E) Inhibition of ROS production  
 934 does not affect the impaired intracellular survival of the  $\Delta clpL$  and  $\Delta psaB$  mutants. A549 cells  
 935 were infected with the  $\Delta visR$ ,  $\Delta sodA$  and *wt* cells and intracellular survival was determined as  
 936 described in the Fig 1 legend. White bars correspond to non-virus infected cells, green bars to  
 937 IAV-infected cells and blue bars to NAC-treated cells. For all panels, data are representative of at

938 least three independent experiments and statistically significant differences are indicated as  
939  $p < 0.01$  (\*\*) or  $p < 0.001$  (\*\*\*).

940

941 **Fig 6. The viral-bacterial synergism is dependent on autophagic-proficient cells.** IAV-  
942 infected and non-virus MEF (A) and MEF *atg5* KO (B) cells were incubated with the wt and the  
943  $\Delta visR$  strains for 4 h, and bacterial intracellular survival was assessed as described in the Fig.  
944 1A legend. White bars indicate bacterial infection and green bars indicates superinfection. Data  
945 are representative of at least three independent experiments and statistically significant  
946 differences are indicated as  $p < 0.05$  (\*) or  $p < 0.01$  (\*\*).

947

948 **Fig. 7. Proposed model for the synergistic mechanism that exists between influenza A and**  
949 ***S. pneumoniae* in pneumocytes.**

950

## 951 **Supporting information**

952 **S1 fig. Determination of apoptosis and necrosis levels in A549 cells infected with IAV**  
953 **and/or *S. pneumoniae*.** (A) A549 cells were infected with different MOI of IAV for 24 h and  
954 coinfectd with a bacterial MOI of 30. Apoptosis/necrosis was measured at the single-cell level by  
955 labeling cells with annexin-V-APC and counterstaining with propidium iodide (PI). Representative  
956 data are shown and percentage of cells are indicated in each quadrant (lower left: APC<sup>-</sup>/PI<sup>-</sup>, intact  
957 cells; lower right: APC<sup>+</sup>/PI<sup>-</sup>, apoptotic cells; upper left: APC<sup>-</sup>/PI<sup>+</sup>, necrotic cells; upper right:  
958 APC<sup>+</sup>/PI<sup>+</sup>, late apoptotic or necrotic cells). (B) The bar chart describes the percentual distribution  
959 of necrotic, apoptotic and viable cells after infection with different MOI of IAV or with  
960 superinfection with *S. pneumoniae*.

961

962 **S2 fig. Identification of histidine kinase (*hk*) mutants of *S. pneumoniae* displaying normal**  
963 **intracellular survival in pneumocytes.** A549 cells were infected with different *hk* mutants and  
964 its intracellular survival capacity was determined as described for non-virus infected cells in the  
965 Fig 1 legend, and these results were compared with those obtained for the *wt* strain. Green bars  
966 and blue bars correspond to 2 h and 4 h of incubation after antibiotic treatment, respectively.

967

968 **S3 fig. Confirmation of the IAV-induced ROS production in A549 cells.** (A) Representative  
969 flow cytometry histogram showing results of H<sub>2</sub>DCF-DA staining (a measurement of ROS levels)  
970 of IAV-infected A549 cells or mock-A549 cells. (B) Bar graph depicting results of IAV-infected  
971 A549 cells compared with non-infected cells. Data are representative of at least three  
972 independent experiments.

973

974 **S4 fig. VisR is a global regulator that controls gene expression during the stress**  
975 **response.** (A) Gene expression scatter plot in samples obtained from the *wt* strain and the  $\Delta visR$   
976 mutants, with the *x*-axis representing the gene expression values for the control condition (*wt*)  
977 and the *y*-axis representing those for the treated condition ( $\Delta visR$ ). Each black dot represents a  
978 significant single transcript, with the vertical position of each gene representing its expression  
979 level in the experimental conditions and the horizontal one representing its control strength. Thus,  
980 genes that fall above the diagonal are over-expressed whereas genes that fall below the diagonal  
981 are under-expressed as compared to their median expression levels in the experimental groups.  
982 (B) Volcano plot of gene expression in *wt* vs  $\Delta visR$  samples measured by RNAseq. The *y*-axis  
983 represents the mean expression value of the log<sub>10</sub> (*p*-value), while the *x*-axis displays the log<sub>2</sub> fold  
984 change value. Black dots represent genes with an expression 2-fold higher in the  $\Delta visR$  mutant  
985 relative to strain *wt* with a *p*-value < 0.05, with red dots signifying genes with an expression 2-fold  
986 lower in the  $\Delta visR$  mutant, which are relative to strain *wt* with a *p* < 0.05.

987

988 **S5 fig. Comparative proteomic analysis between the *wt* and the  $\Delta visR$  strains.** Volcano plot  
989 reflecting the results from the statistical analysis of differentially expressed proteins quantified  
990 among the proteome of the *wt* strain and the  $\Delta visR$  mutant. Statistical analysis was performed by  
991 Student t-test and statistical significance was considered for *p*-values < 0.05. Significant values  
992 are represented as red dots.

993

994 **S6 fig. Identification of the pneumococcal 78-kDa ClpL chaperone expressed under acidic**  
995 **conditions.** (A) SDS-PAGE analysis of protein extracts obtained from the *wt* cells grew at slightly

alkaline (pH 7.8) or acidic (pH 5.9) culture media. The protein band subjected to N-terminal sequencing is indicated by an arrow. (B) The N-terminal sequence obtained by Edman degradation were analyzed by tryptic digestion and HPLC-protein sequencer. The m/z values of ions matching peptides derived from the 78-kDa protein band are indicated by numbers. The amino acids sequences corresponding to pick 8 (11 amino acids) and pick 12 (14 amino acids) corresponded to the ClpL chaperone, according to the R6 pneumococcal genome (<https://www.uniprot.org/ proteomes/UP000000586>).

**S7 fig. IAV and *S. pneumoniae* infection and superinfection induce autophagy in A549 cells.** (A) LC3-II levels are induced by superinfection with IAV and *S. pneumoniae*. A549 cells were infected with IAV (MOI 10), *S. pneumoniae* (MOI 30) and coinfectd as described in the Fig.1A legend. As controls, A549 cells were also treated with inducers (rapamycin) and inhibitors (bafilomycin A1) of the autophagy process. Cell lysates were subjected to Western blot analysis using anti-LC3-II, anti-beta-actin antibodies with data being representative of at least three independent experiments. (B) Quantification of the LC3-II level in western blot: bar graphs represents LC3-II relative intensity (LC3-II/ $\beta$ -actin) with data being representative of at least three independent experiments. (B) Formation of the puncta of mKate2-hLC3 indicating autophagy induction during IAV, *S. pneumoniae* and superinfection. The A549 cells were transfected with the mKate2-hLC3 plasmids for 24 hours, and followed by an IAV, *S. pneumoniae* or superinfection for 4 h. The far-red (mKate2) fluorescence in the cells were monitored using an Olympus FluoView FV1000 confocal laser scanning microscope.

**A**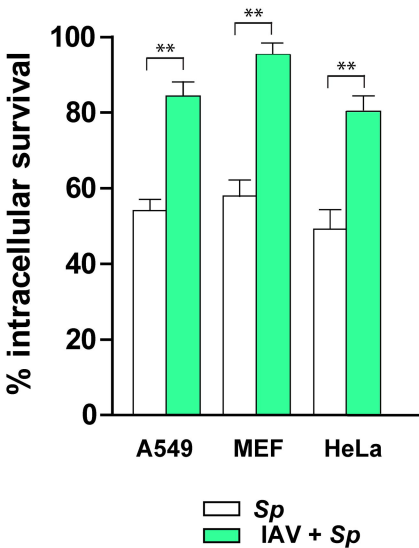**B**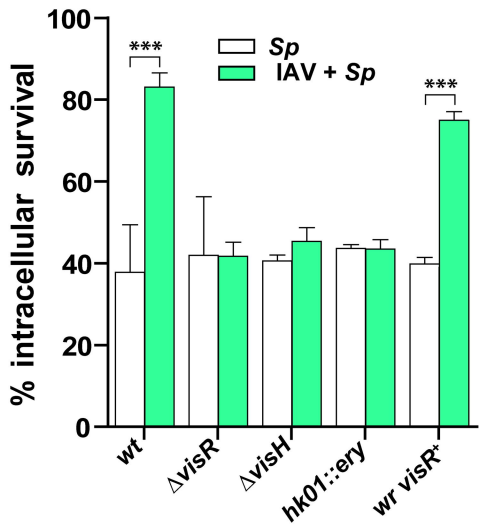

**A**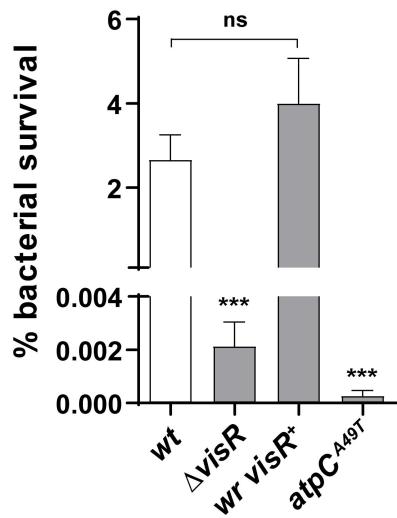**B**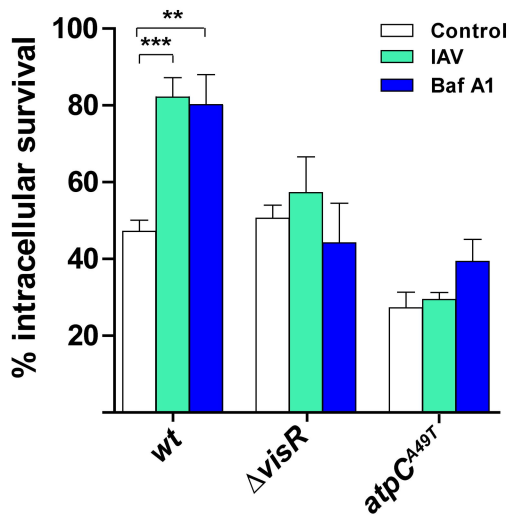**C**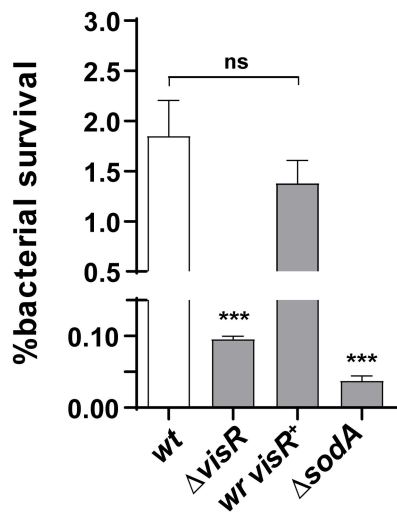**D**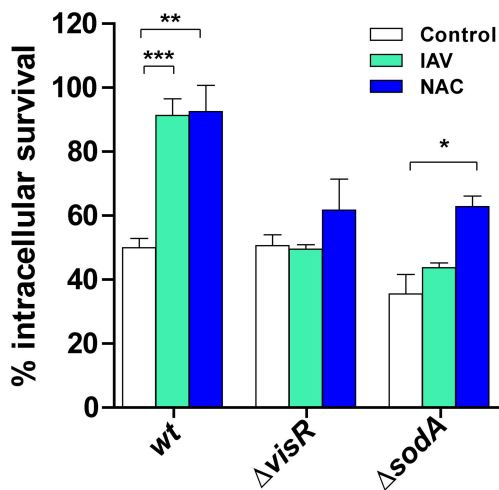

A

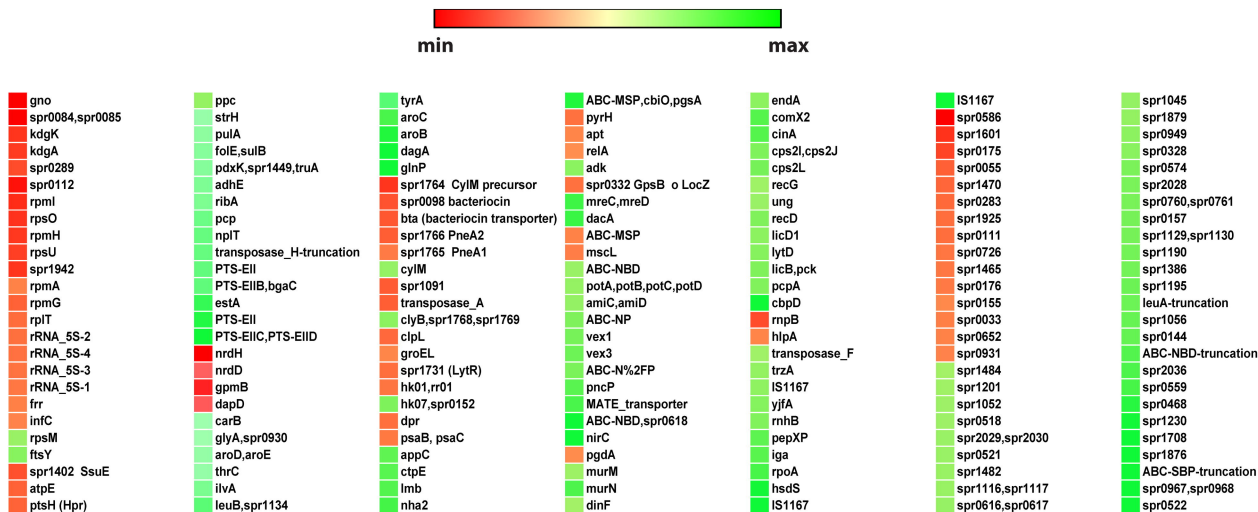

B

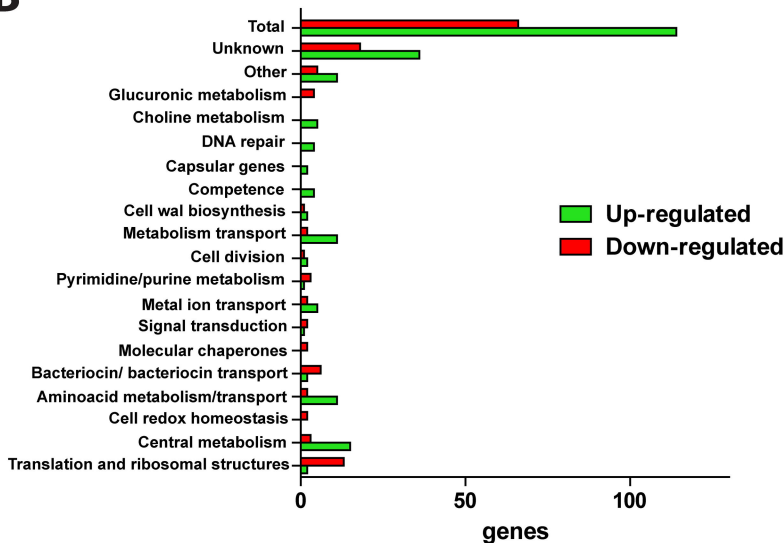

C

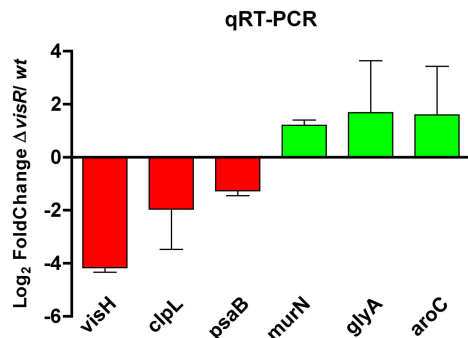



**A**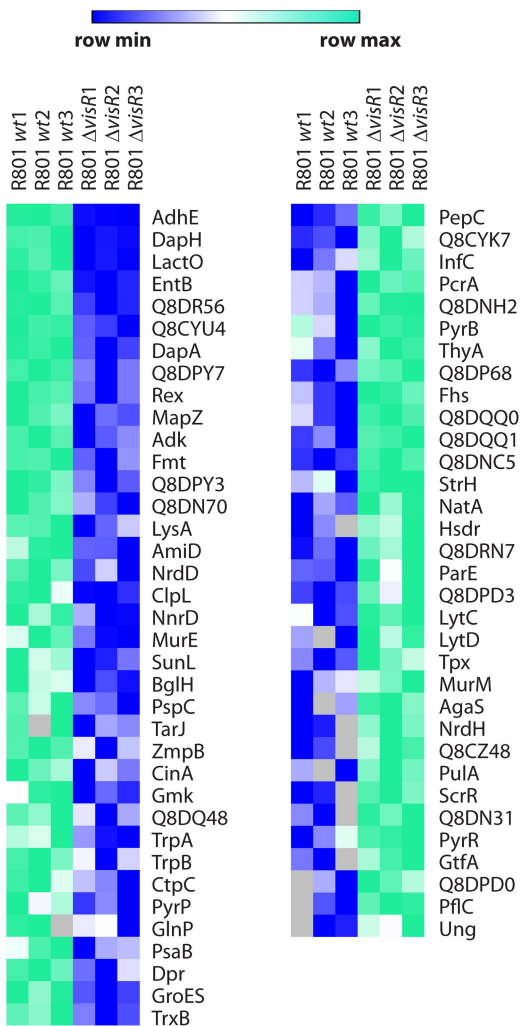**B**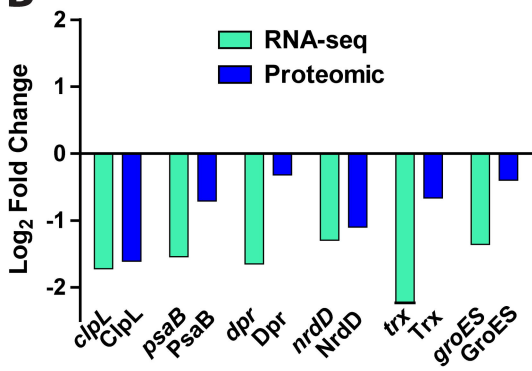

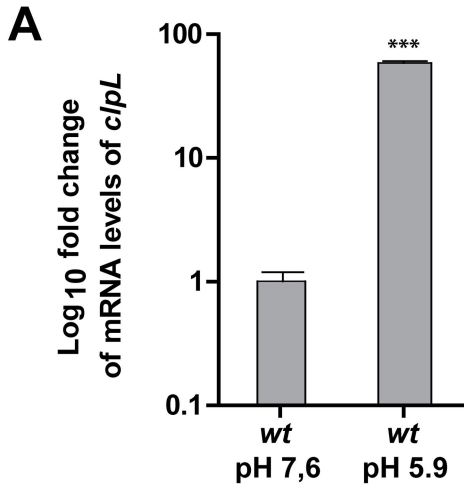

**B**

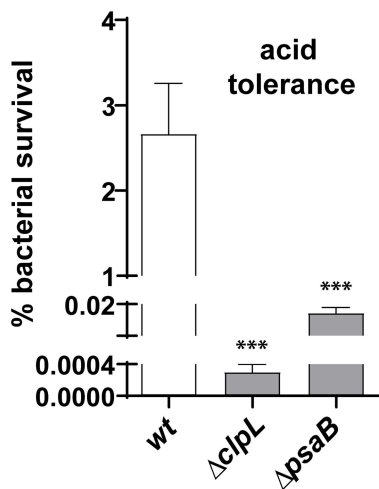

**C**

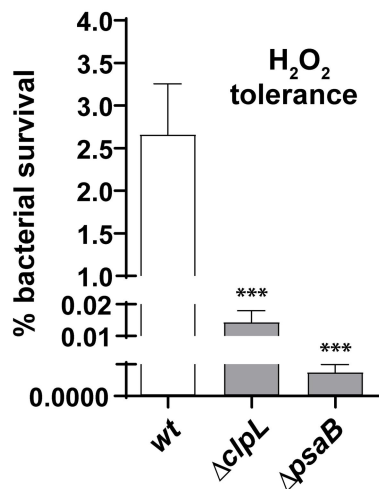

**D**

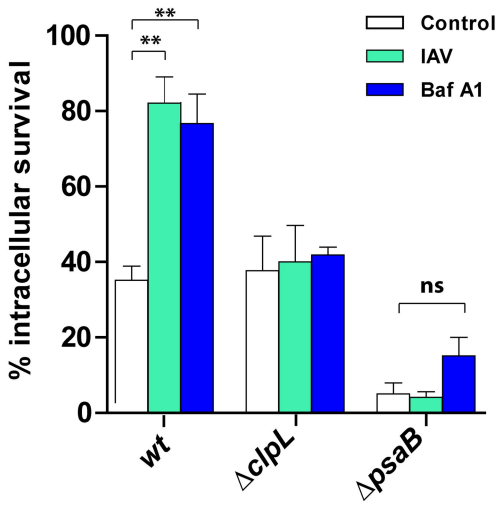

**E**

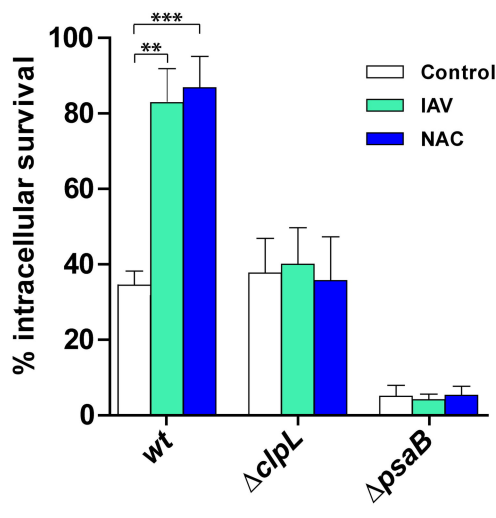

**A****MEF *wt***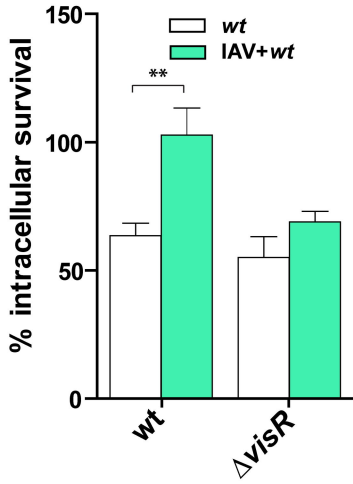**B****MEF *atg5* KO**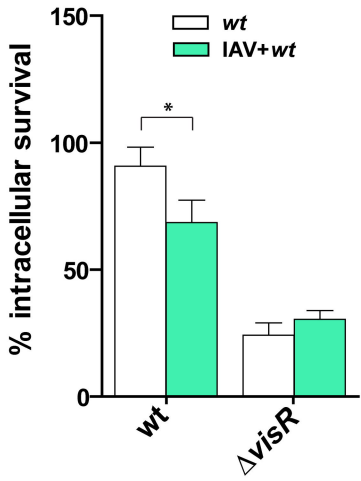

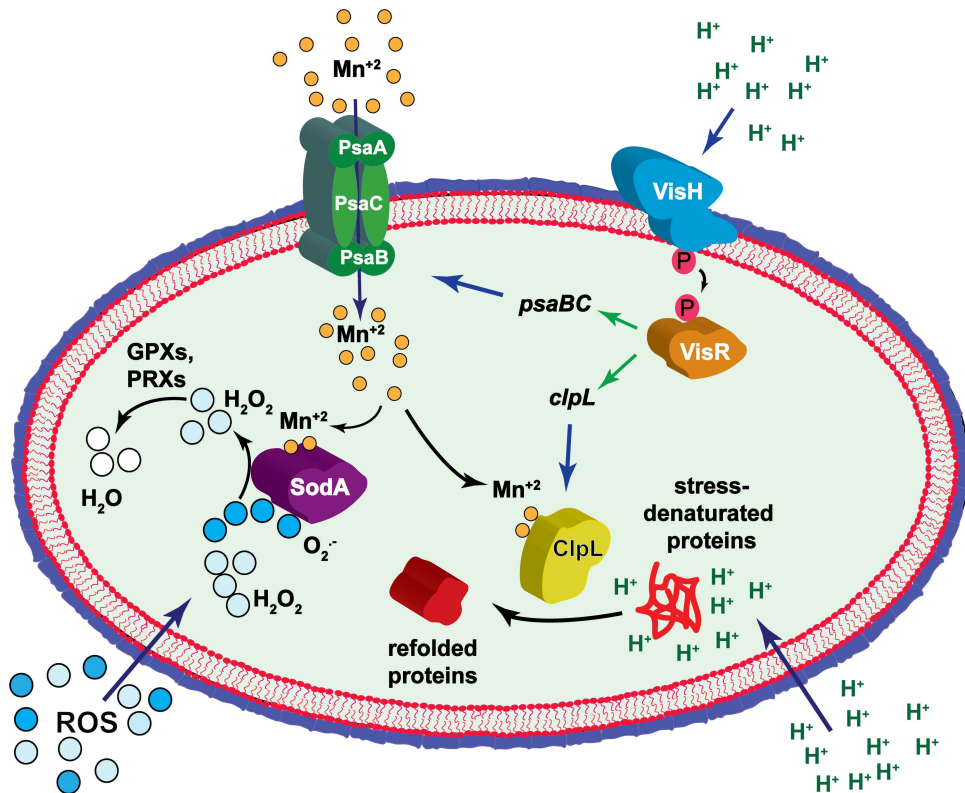

Source: https://www.biorxiv.org/content/10.1101/767855v1.full.pdf
